# Supplementary material for: N-Heterocyclic carbene-catalyzed [4 + 2] cyclization of α,β-unsaturated carboxylic acids bearing γ-H with isatins: an enantioselective synthesis of spirocyclic oxindole–dihydropyranones
Source: Royal Society of Chemistry journal article supplement (doi:10.1039/c5ob02160j), 2015-12-17
Supplement: c5ob02160j1.pdf [file c5ob02160j1.pdf]

## **Supporting Information**

### **N-Heterocyclic carbene-catalyzed [4+2] cyclization of $\alpha,\beta$ -unsaturated carboxylic acids bearing $\gamma$ -H with isatins: An enantioselective synthesis of spirocyclic oxindole–dihydropyranones**

Ling Zhu, Chenxia Yu, Tuanjie Li, Yuhong Wang, Yinan Lu, Wenjing Wang and Changsheng Yao\*

|                                       |    |
|---------------------------------------|----|
| 1. General methods .....              | 1  |
| 2. Abstract.....                      | 1  |
| 3. Experimental section.....          | 1  |
| 4. X-ray structure of <b>3a</b> ..... | 2  |
| 5. NMR Spectures.....                 | 3  |
| 6. HPLC Spectures.....                | 18 |

## 1. General methods

Common reagents and materials were purchased from commercial sources and purified by recrystallization or distillation. Melting points were determined in open capillaries and were uncorrected. IR spectra were taken on a FT-IR-Tensor 27 spectrometer in KBr pellets and reported in  $\text{cm}^{-1}$ .  $^1\text{H}$  NMR spectra were measured on a Bruker DPX 400 MHz spectrometer in  $\text{CDCl}_3$  (100 MHz,  $^{13}\text{C}$  NMR) with chemical shift ( $\delta$ ) given in ppm relative to TMS as internal standard. High-resolution mass spectra (HRMS) were obtained on a microTOF-Q II HRMS/MS instrument (Bruker) with the technique of electrospray ionization.

## 2. Abstract

An NHC-catalyzed asymmetric [4+2] annulation of isatins and  $\alpha,\beta$ -unsaturated carboxylic acids bearing  $\gamma$ -H gave spirocyclic oxindole-dihydropyranones successfully via in situ activation strategy. This protocol featured easy availability of raw materials, good yields and excellent enantioselectivities (up to 99% ee).

## 3. Experimental section

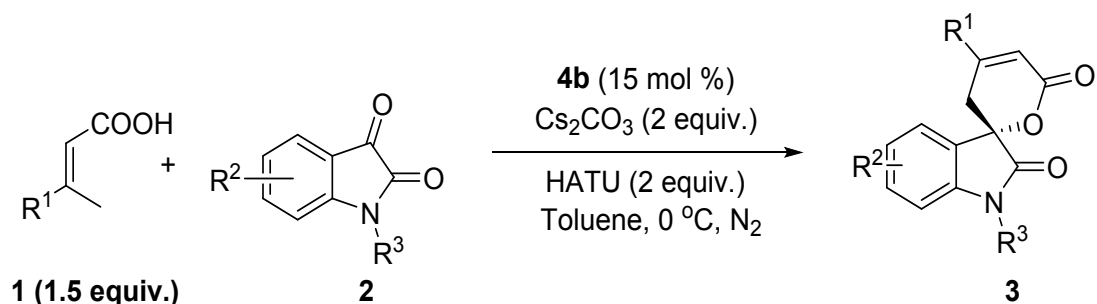

An oven-dried 10-mL Schlenk tube equipped with a magnetic stir bar was charged with triazolium salt **4b** (12.6 mg, 0.03 mmol),  $\text{Cs}_2\text{CO}_3$  (130 mg, 0.4 mmol),  $\alpha,\beta$ -unsaturated carboxylic acid **1** (0.3 mmol), isatin **2** (0.2 mmol) and HATU (228 mg, 0.6 mmol). This tube was closed with a septum, evacuated, and refilled with nitrogen. To this mixture was added freshly distilled toluene (2 mL) with a syringe. Then the mixture was stirred at  $0^\circ\text{C}$  until completion (monitored by TLC). After removal of the solvent under reduced pressure, the resulting crude residue was purified by column chromatography (silicagel, mixtures of petroleum ether/ethyl acetate, 3:1, v/v) to afford the desired product **3**.

#### 4. X-ray structure of 3a

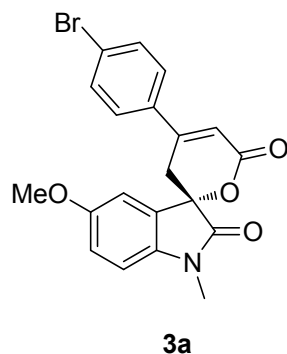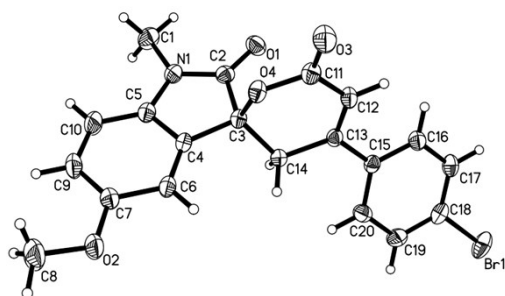

The crystal of compound **3a** was prepared from the solution in petroleum ether/ethyl acetate (M.P.: 207-208 °C). Crystallographic data (excluding structure factors) for the structures in this paper have been deposited with the Cambridge Crystallographic Data Centre as supplementary publication no. CCDC 1046964. Copies of the data can be obtained, free of charge, on application to CCDC, 12 Union Road, Cambridge CB21EZ, UK (fax: +44 1223 336033 or email: [deposit@ccdc.cam.ac.uk](mailto:deposit@ccdc.cam.ac.uk)).

## 5. NMR Spectures

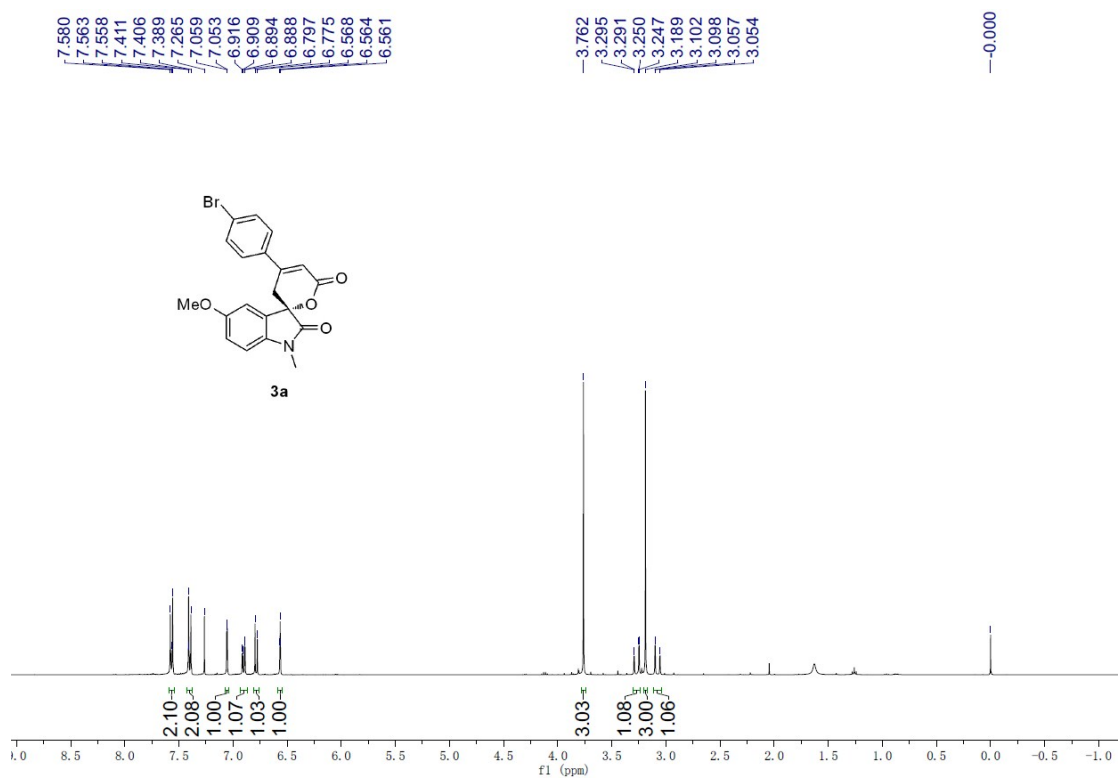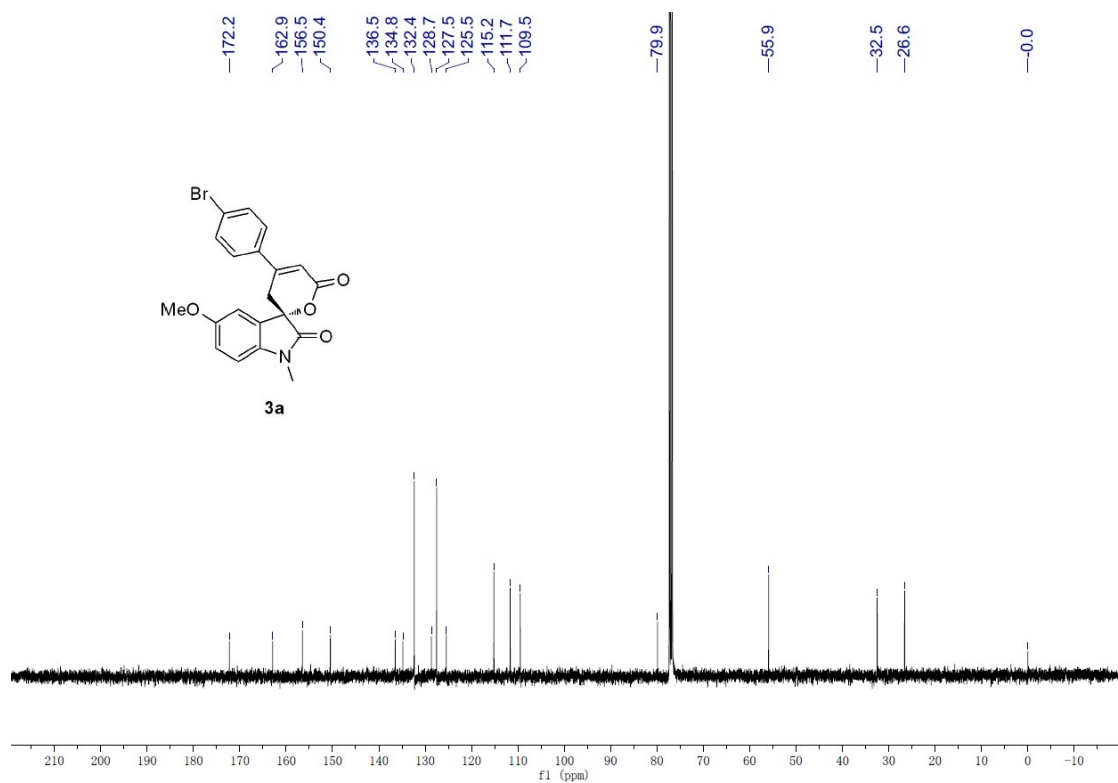

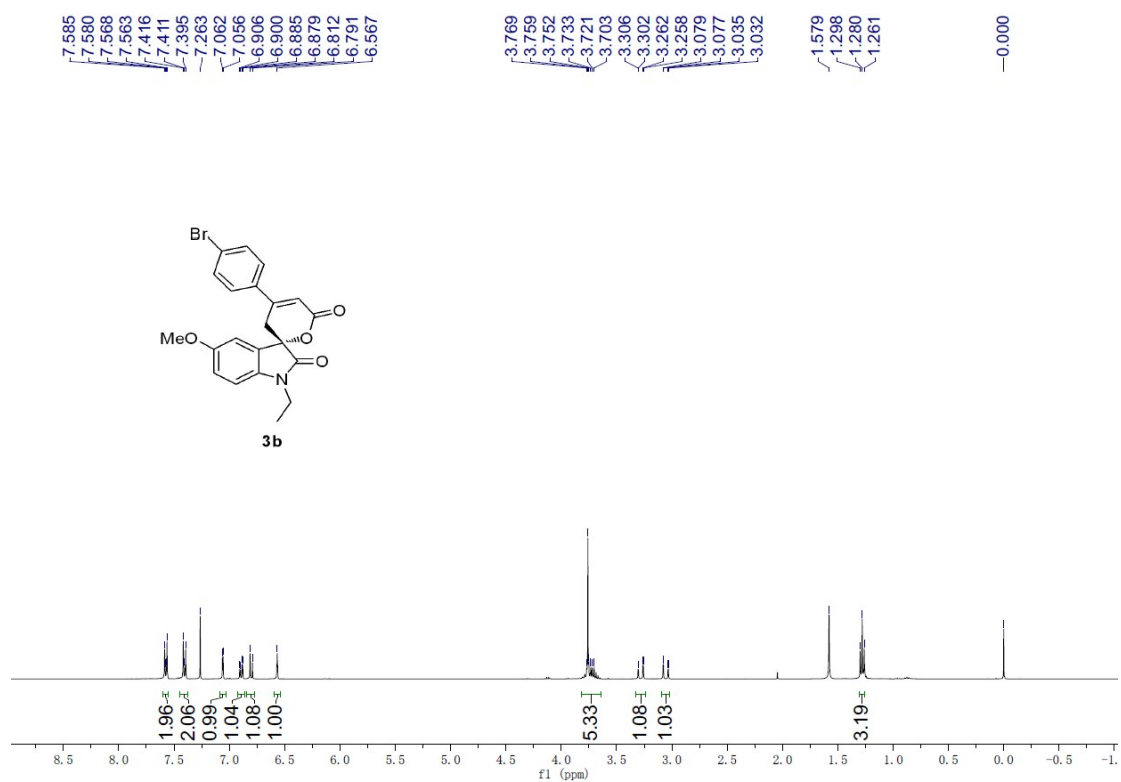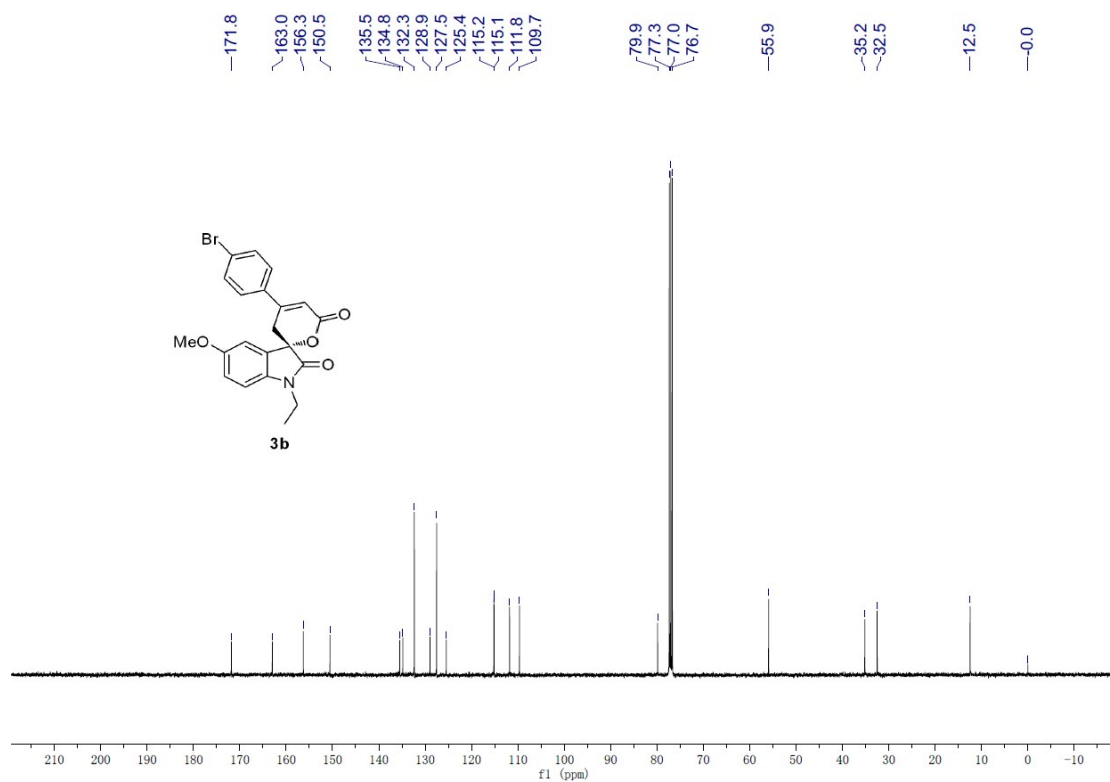

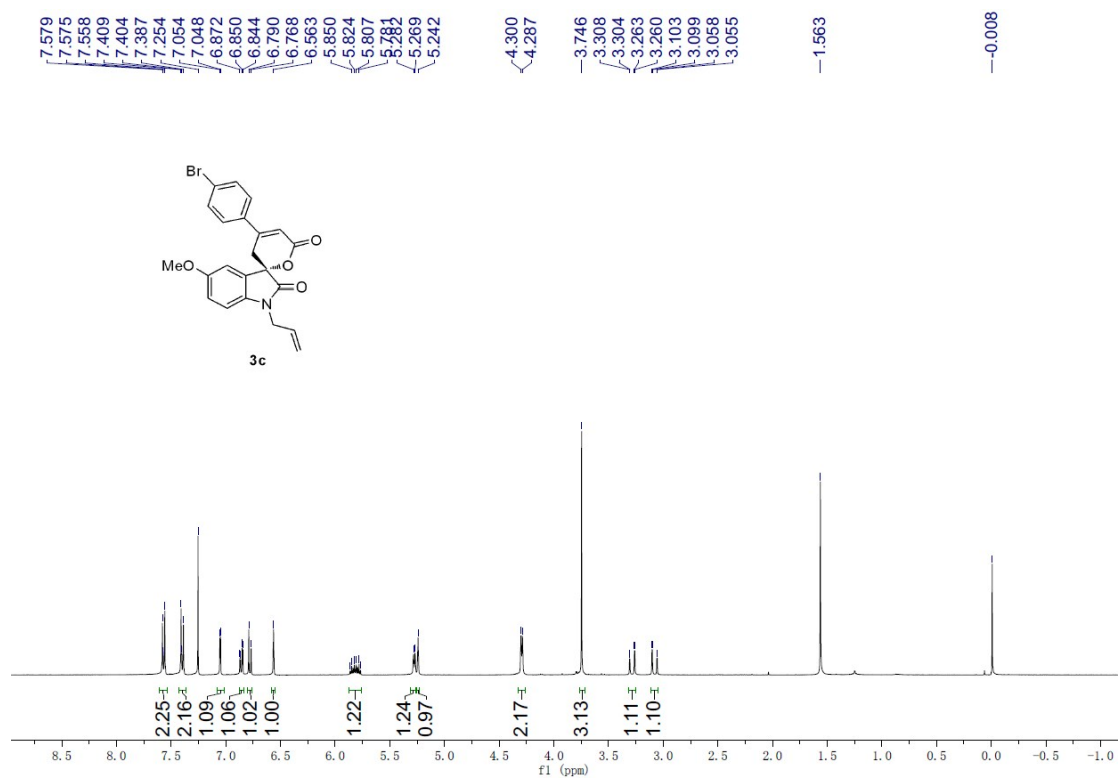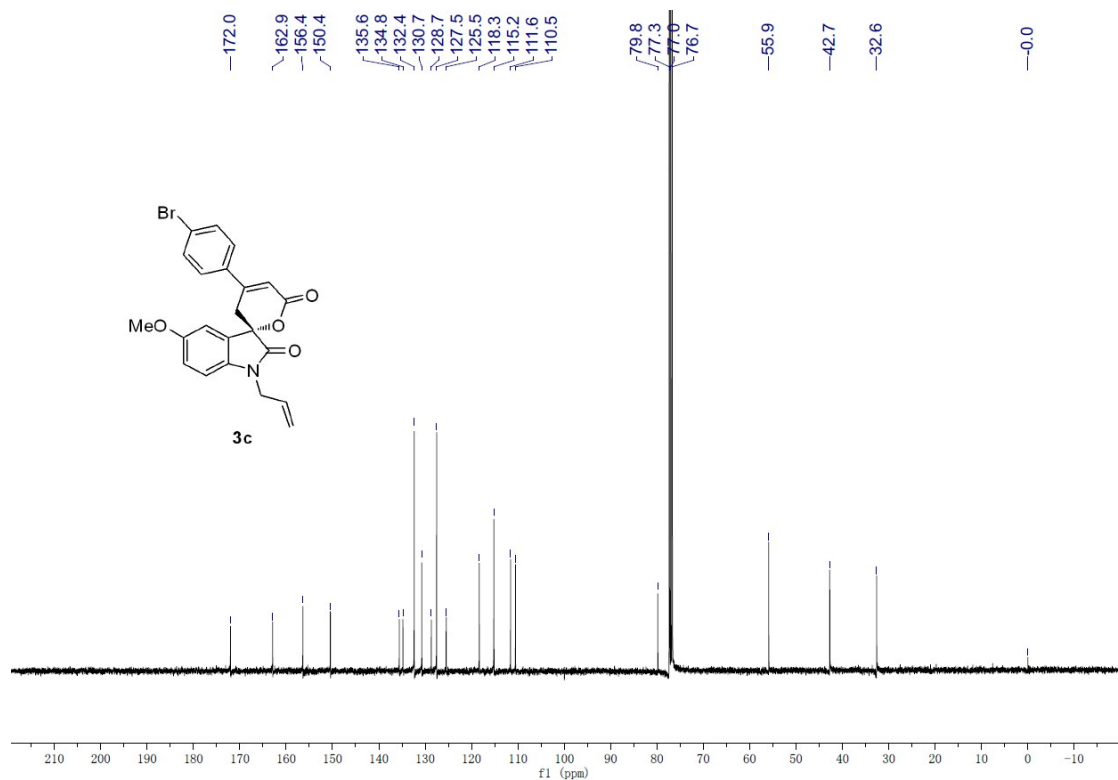

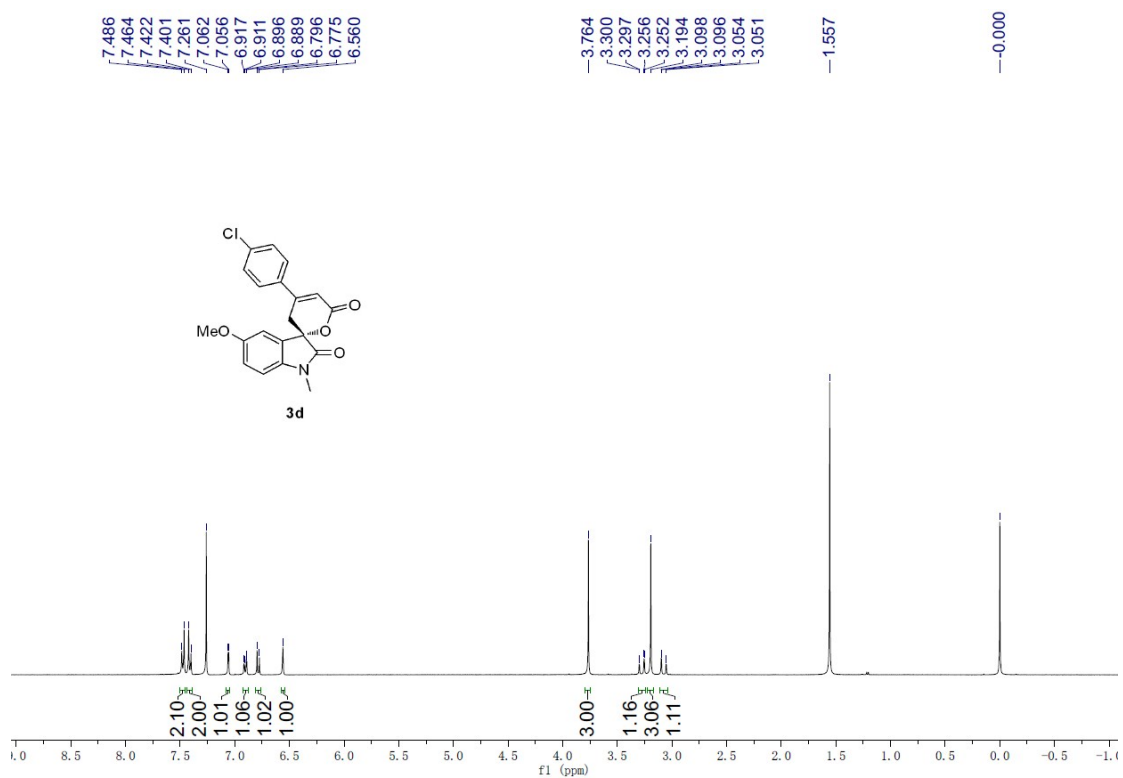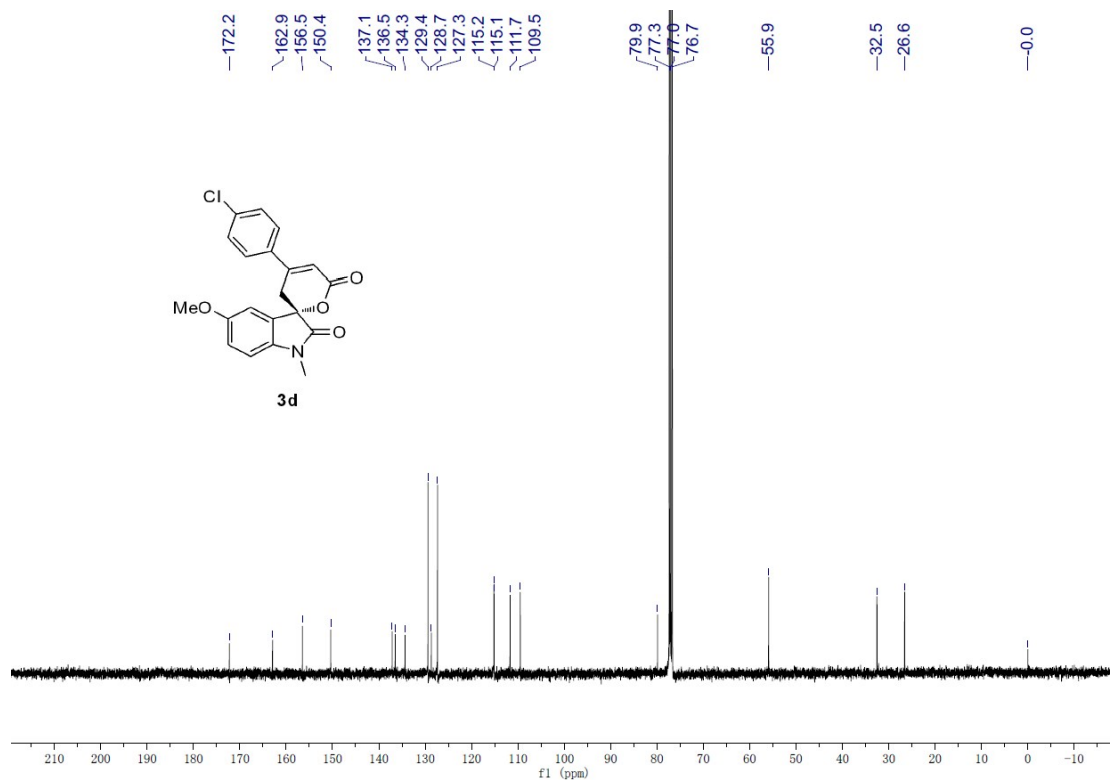



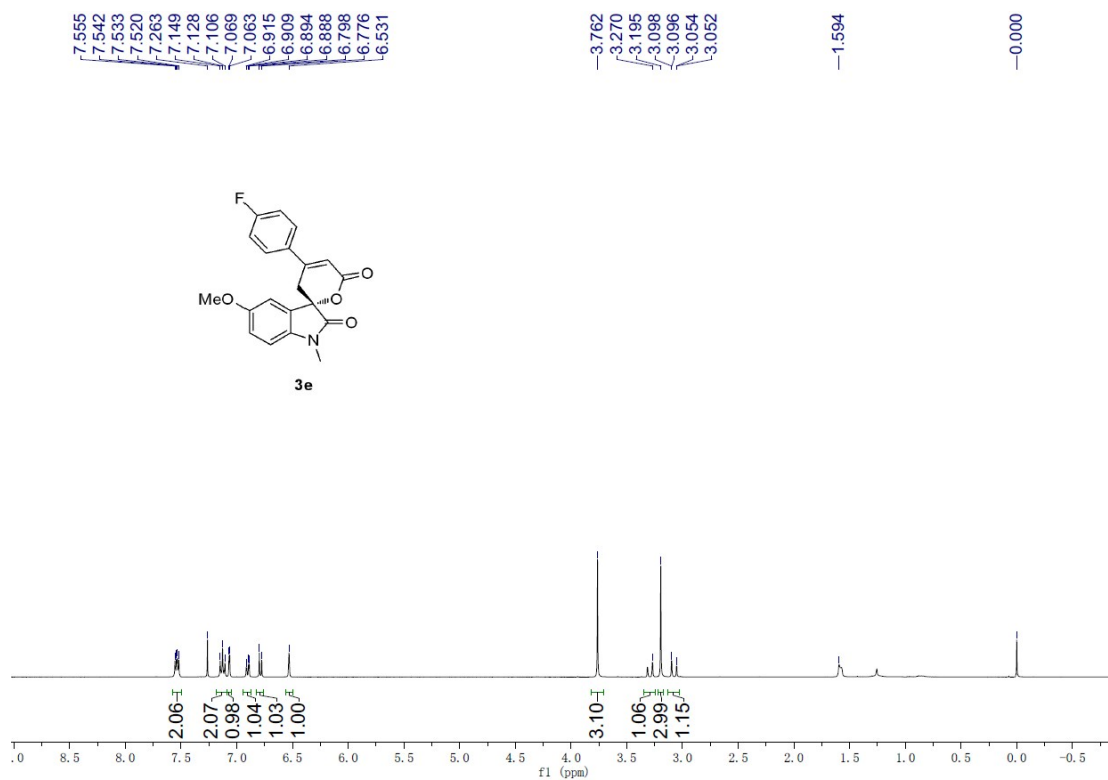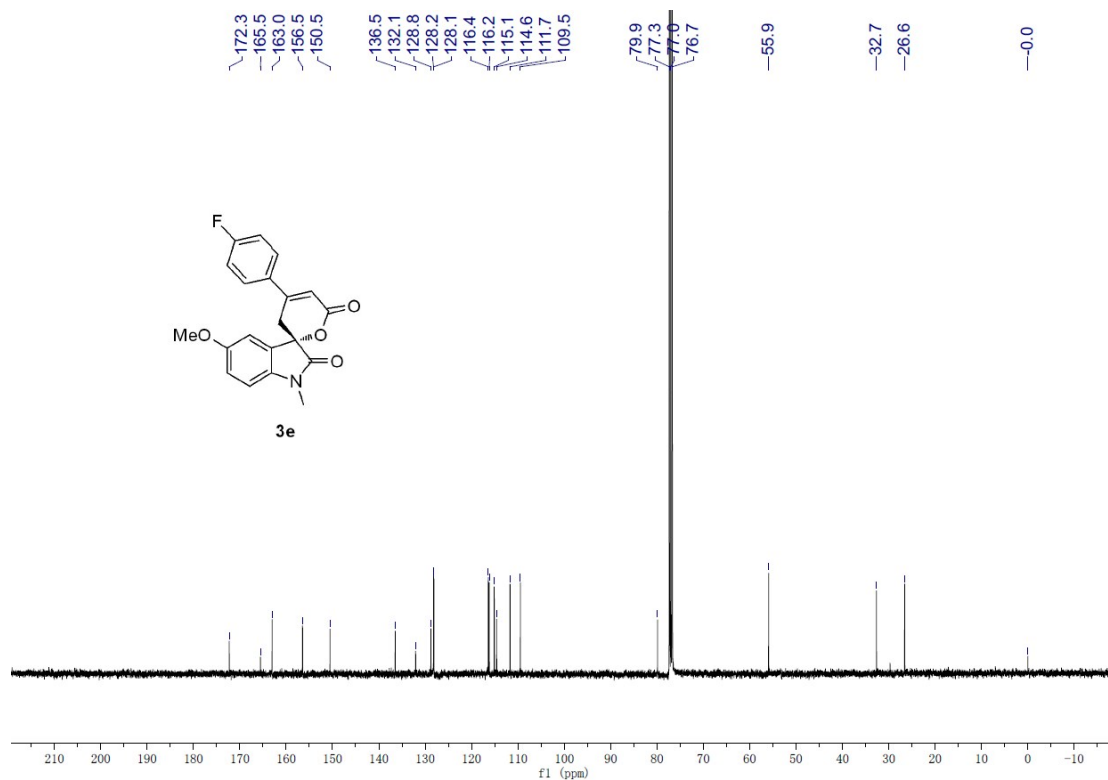

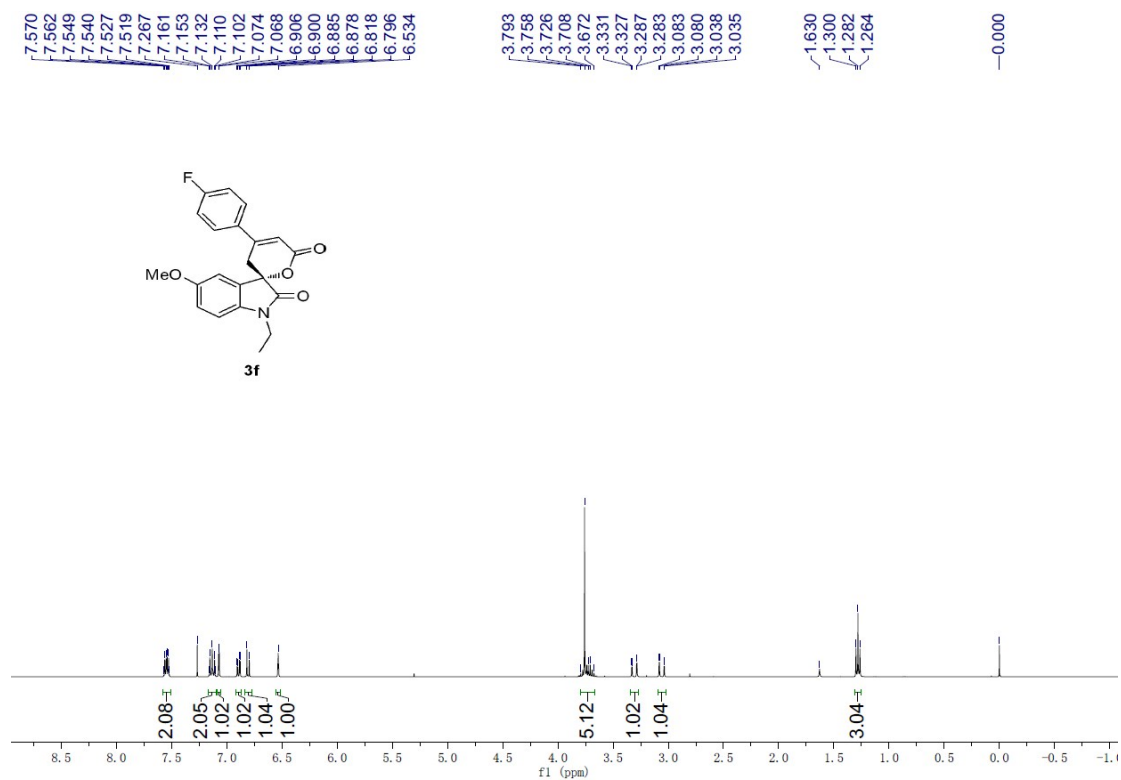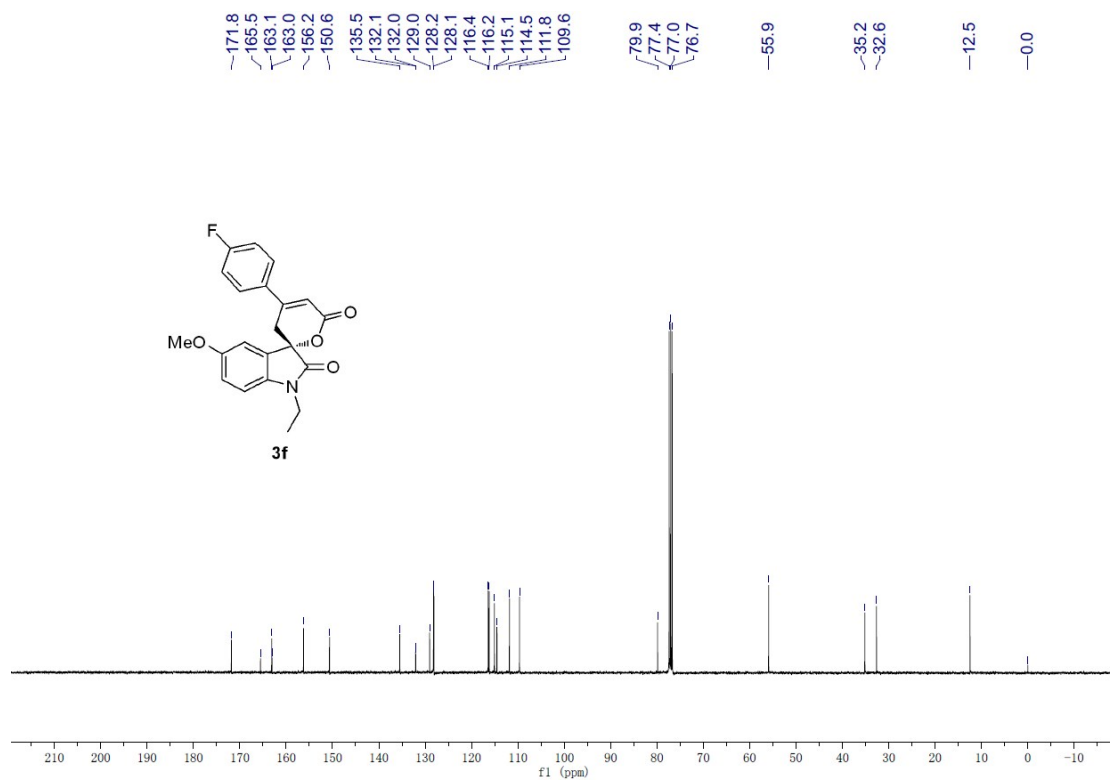

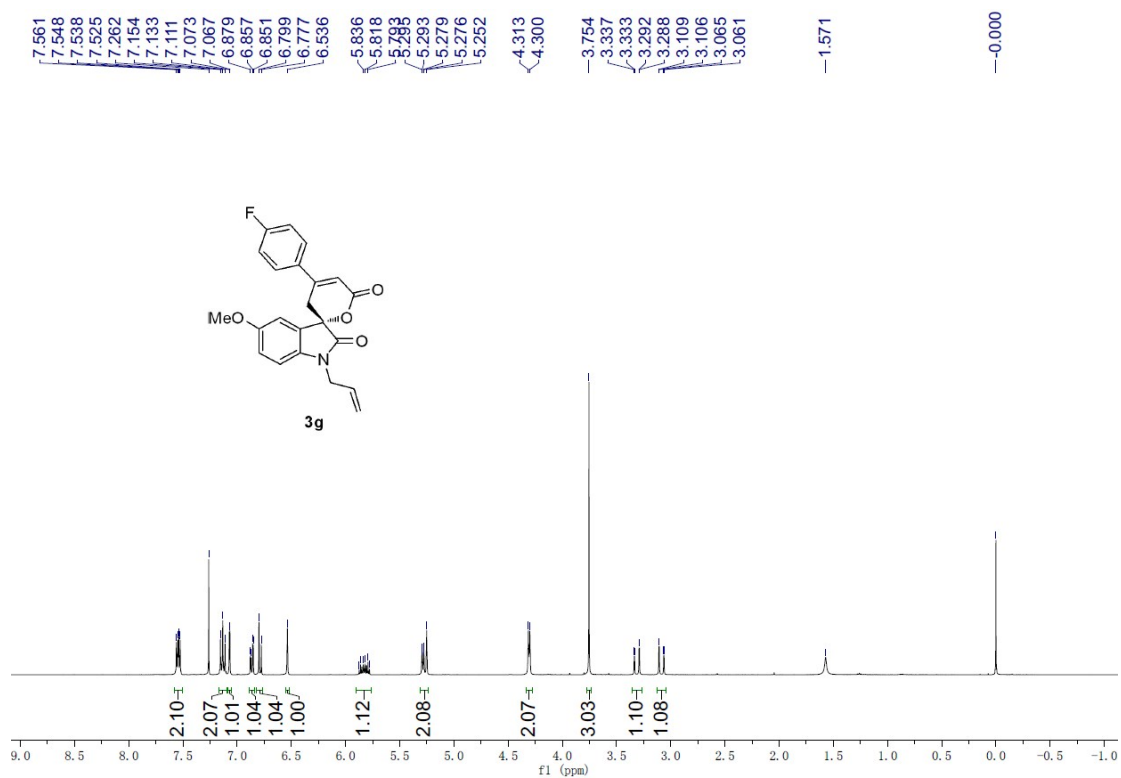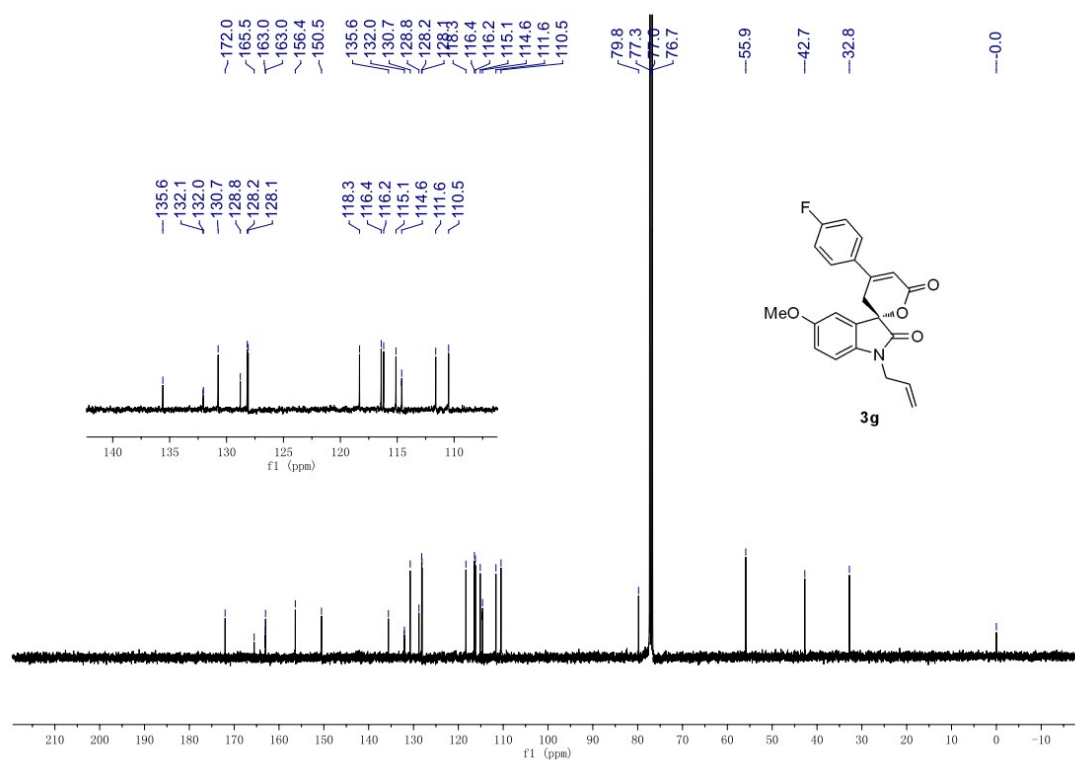

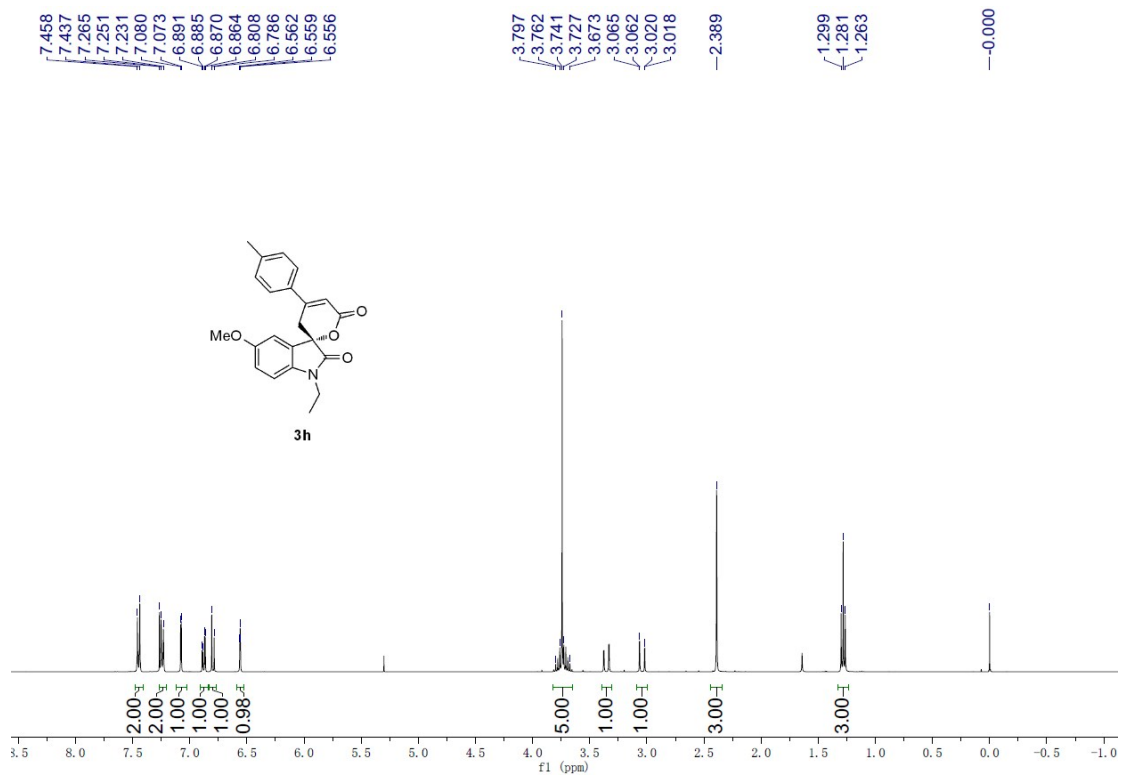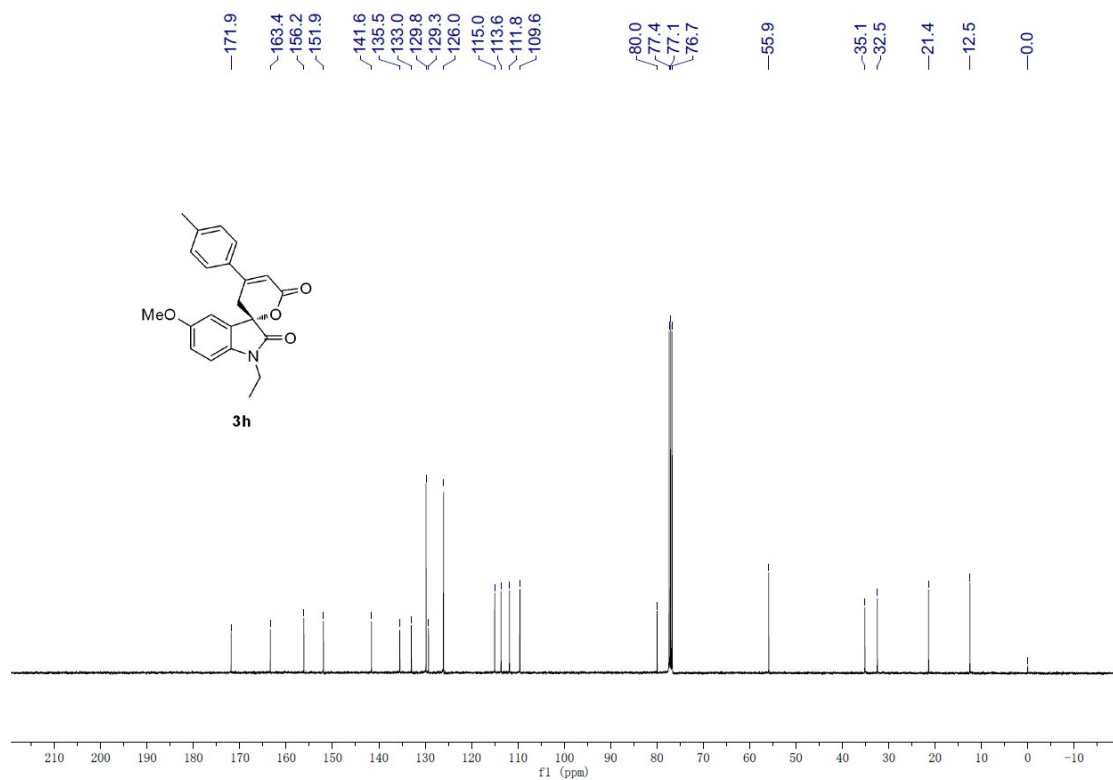

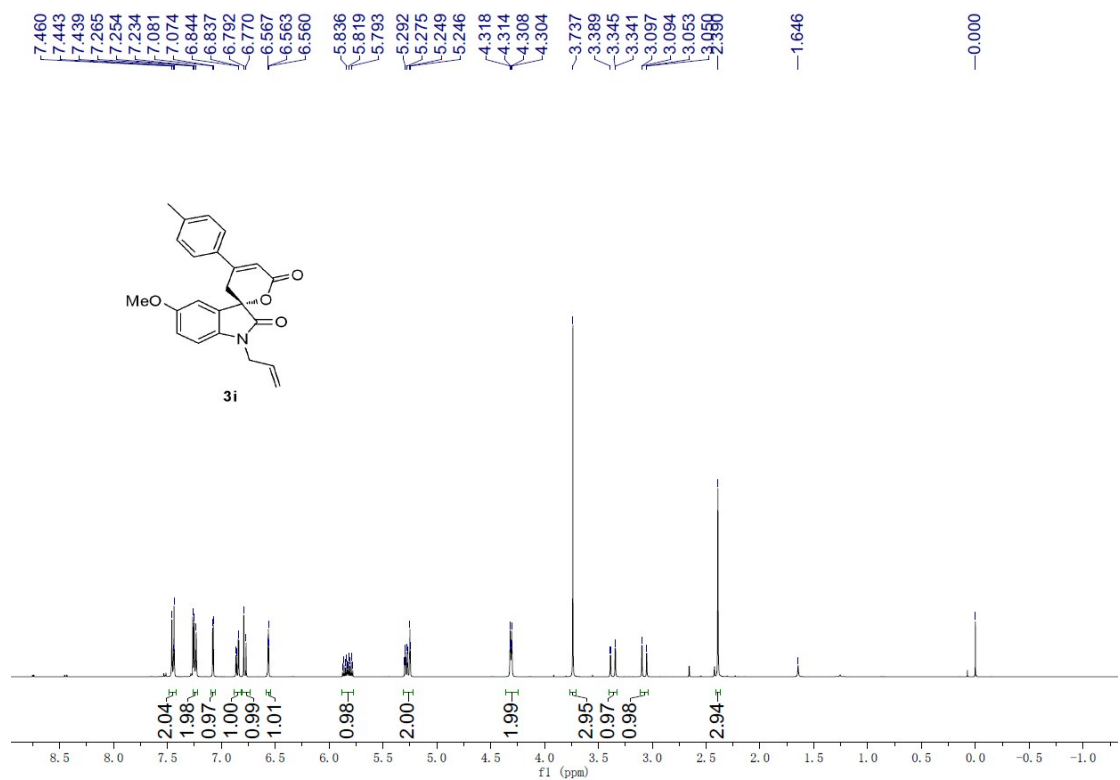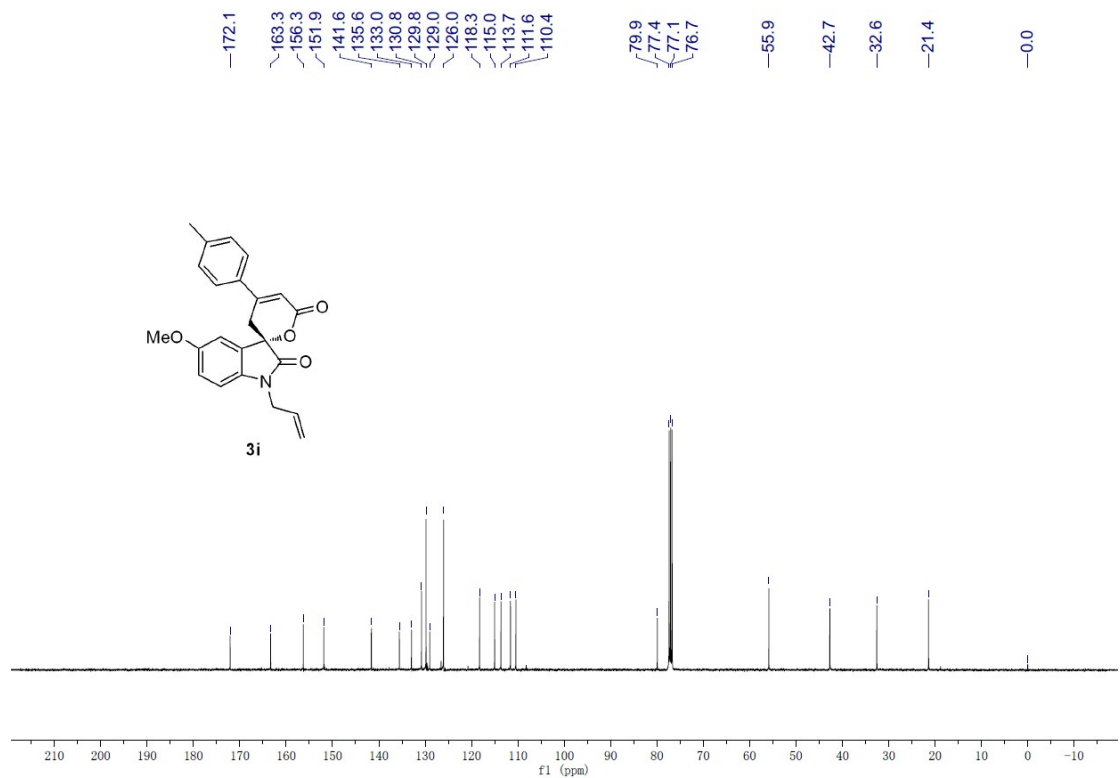

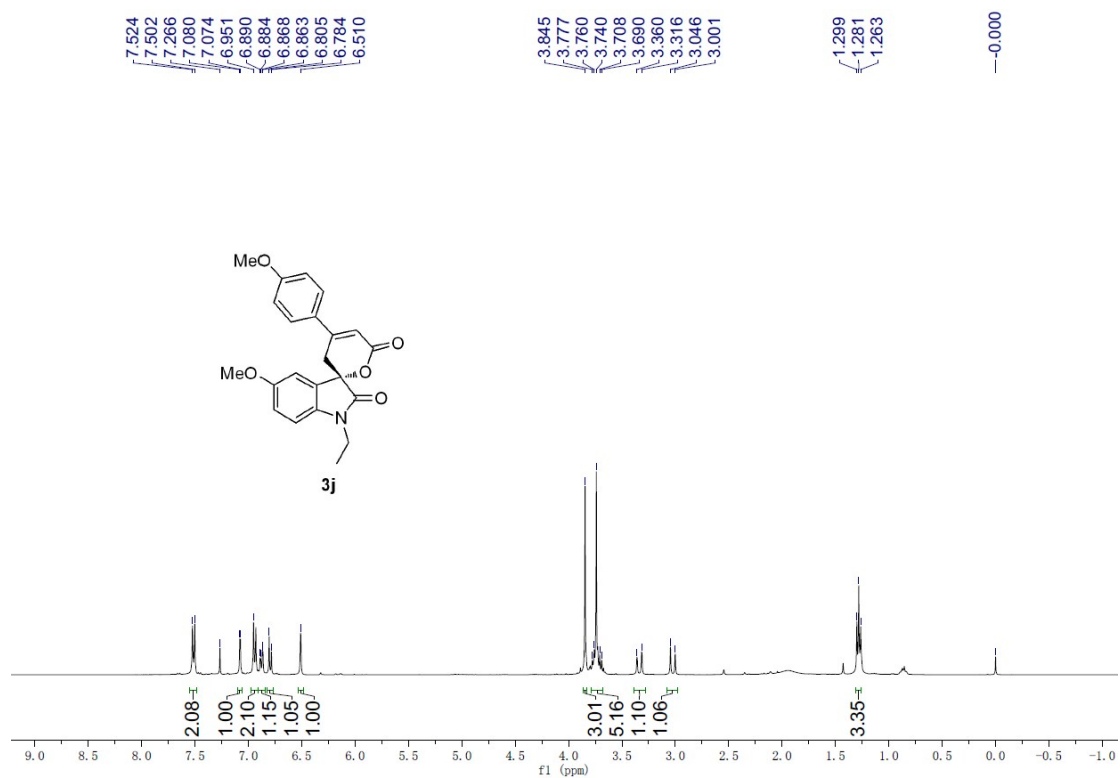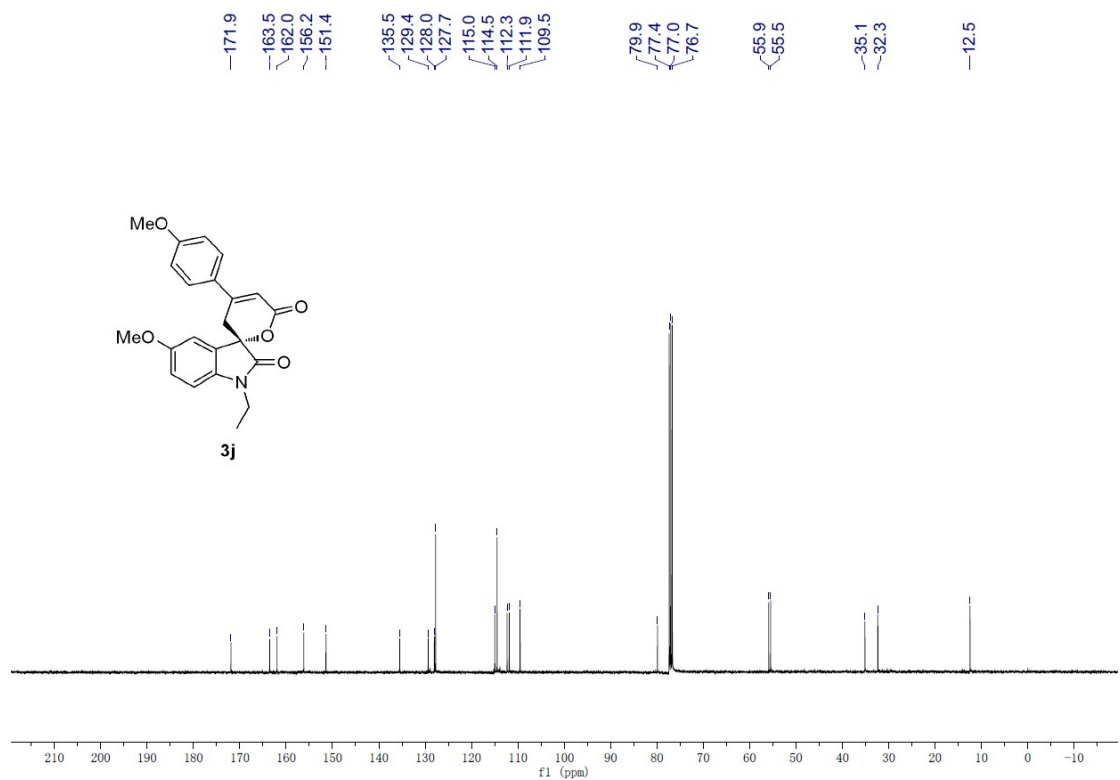

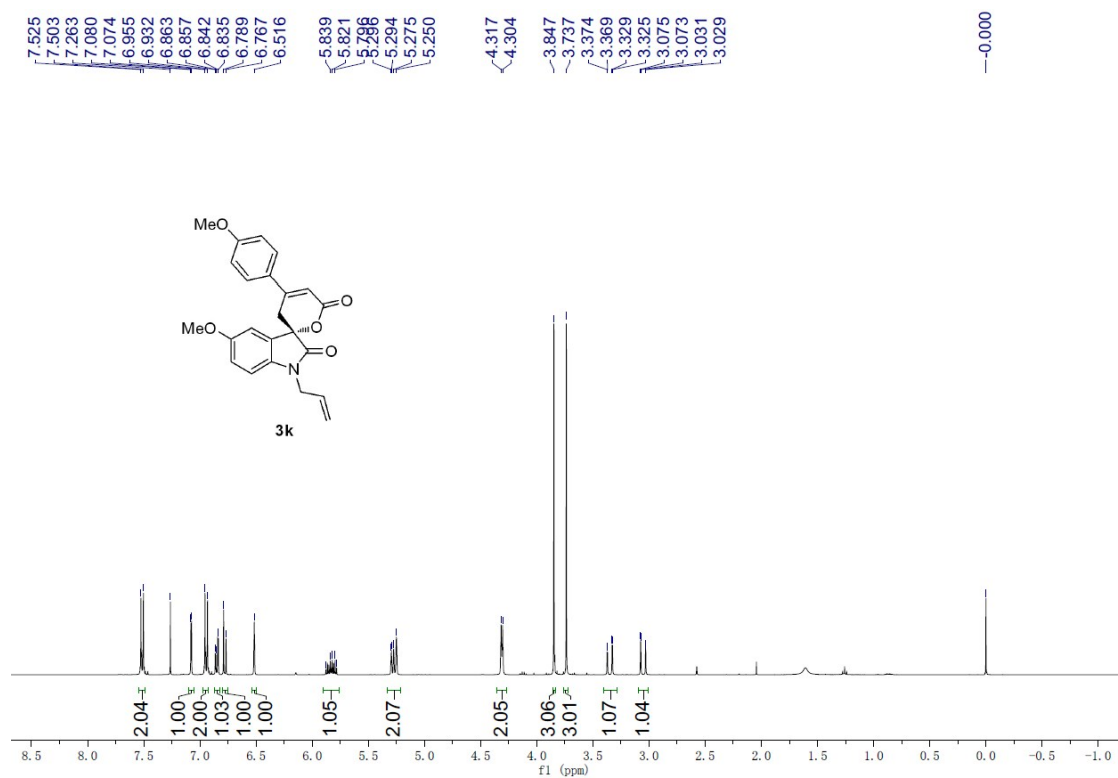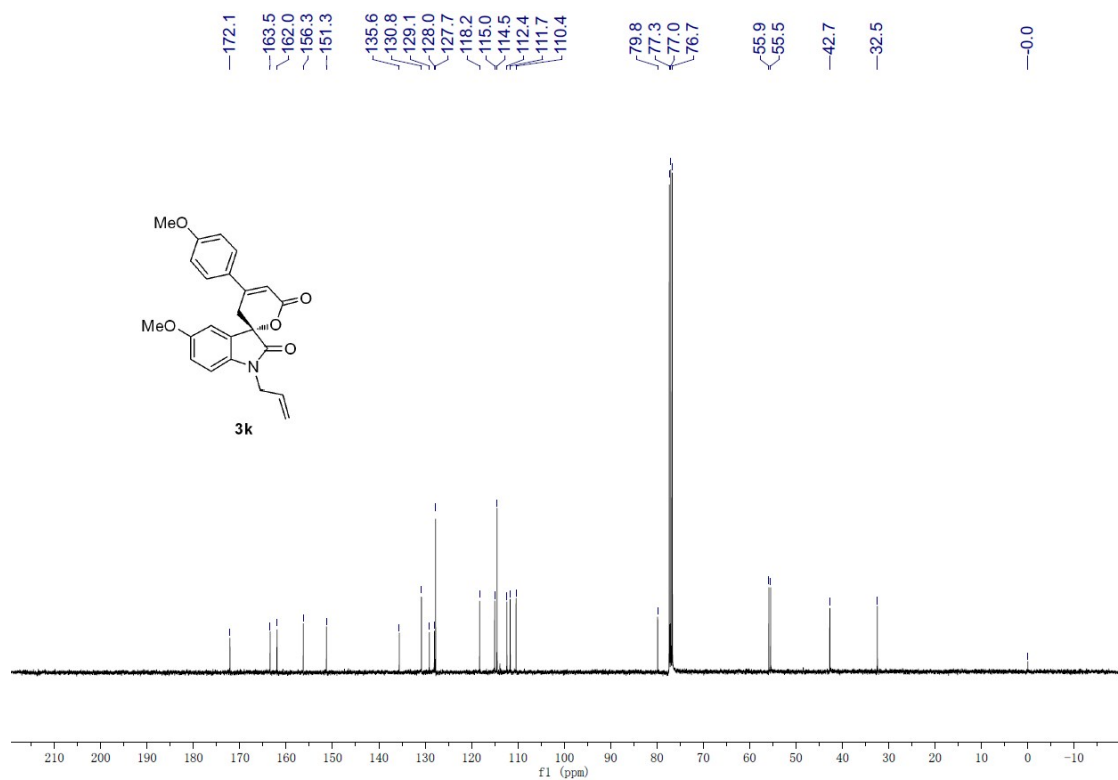

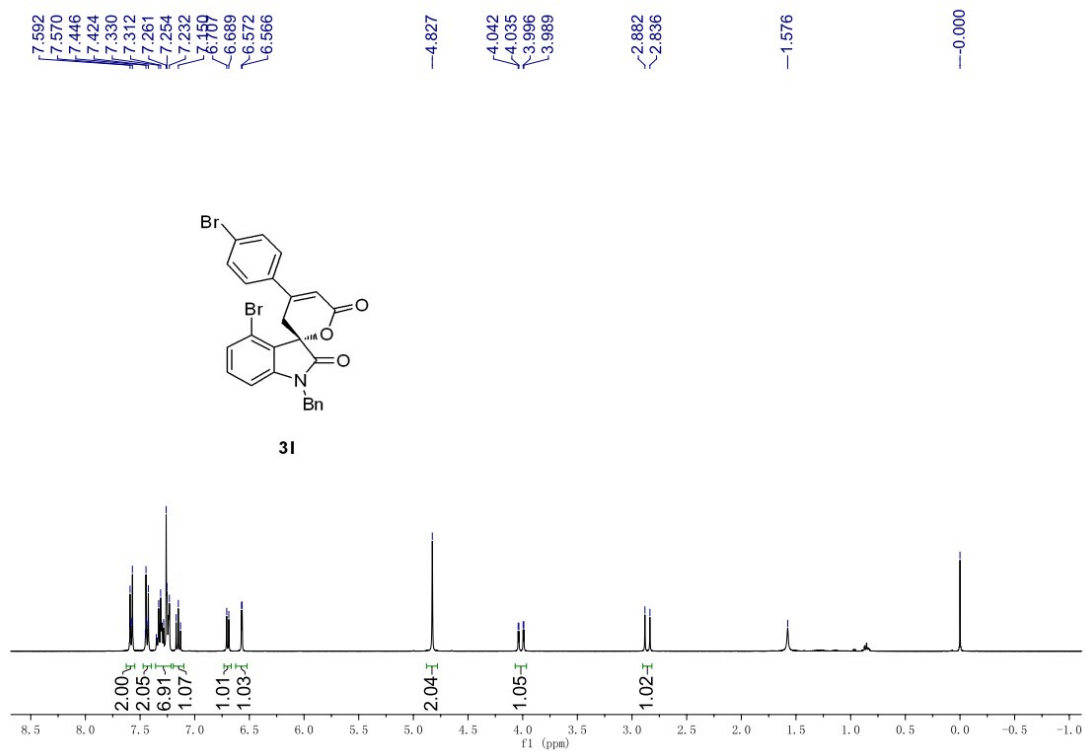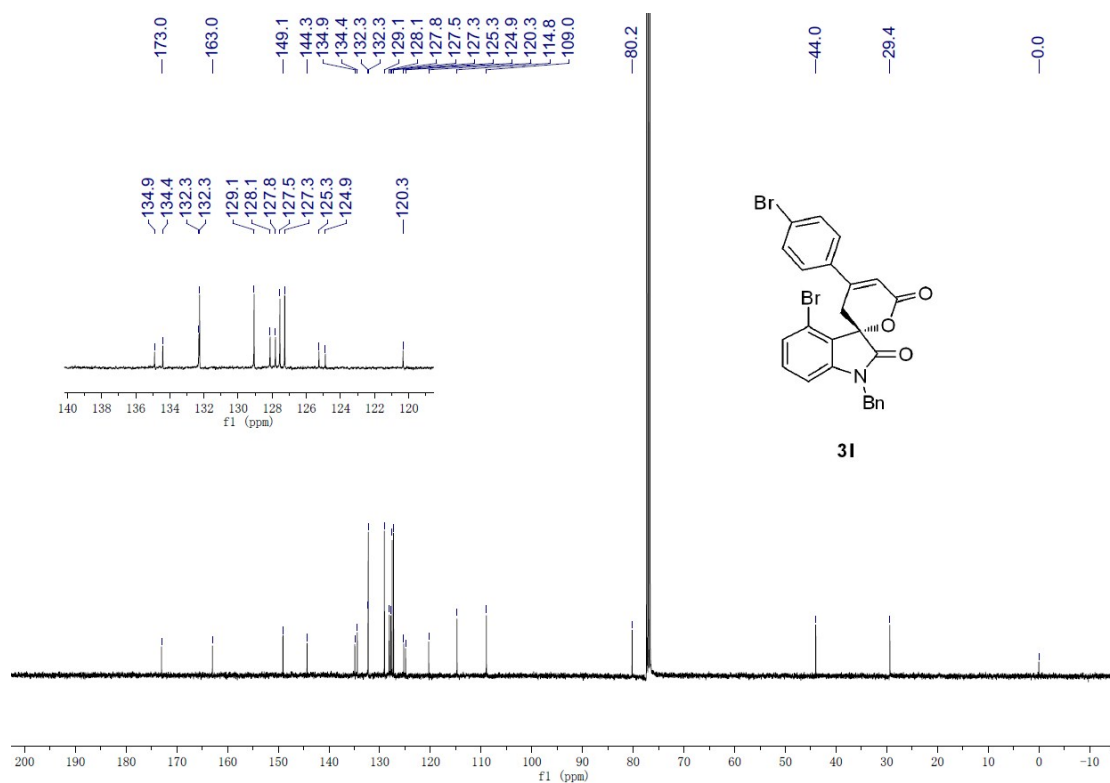



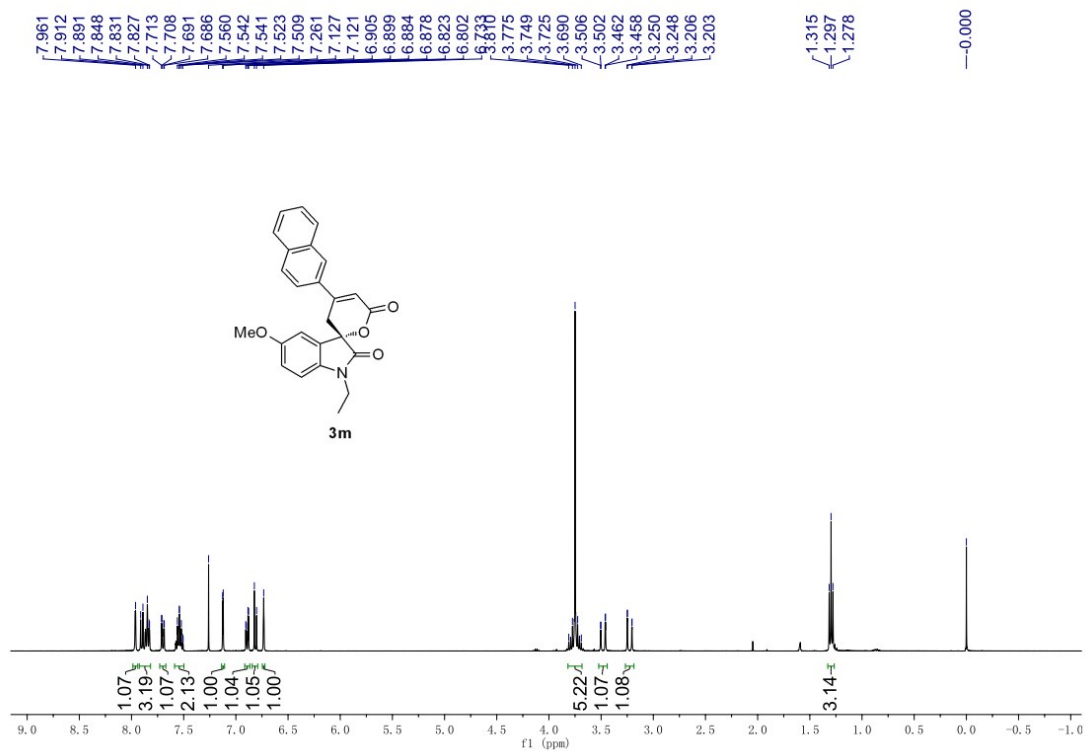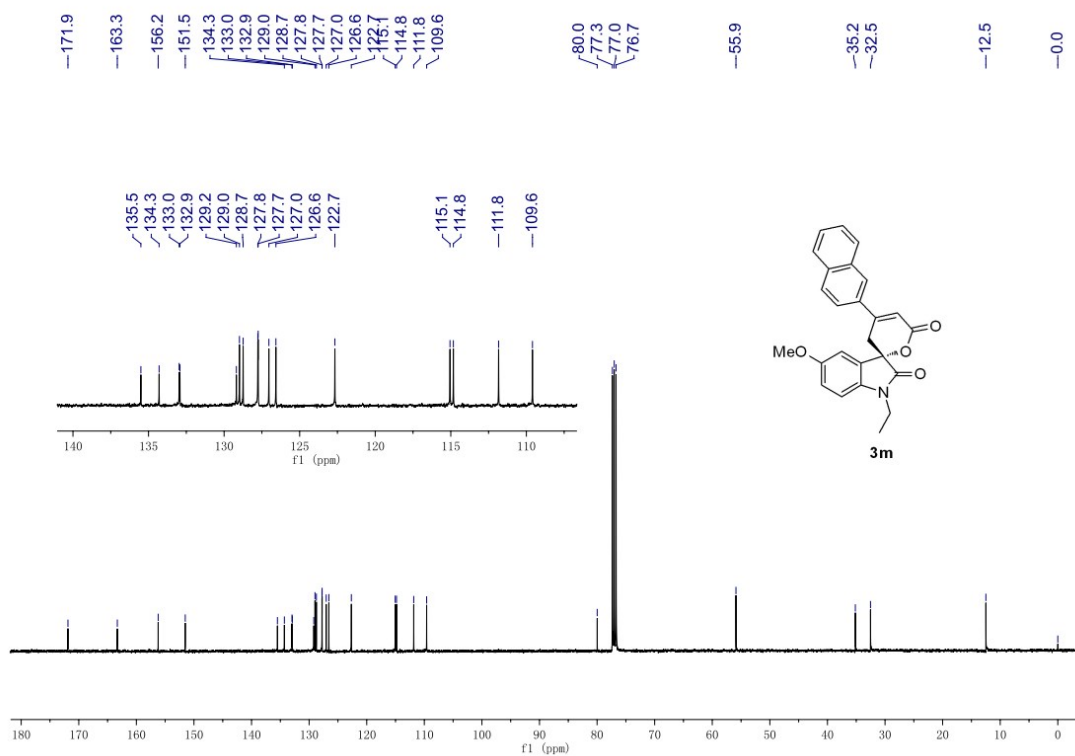

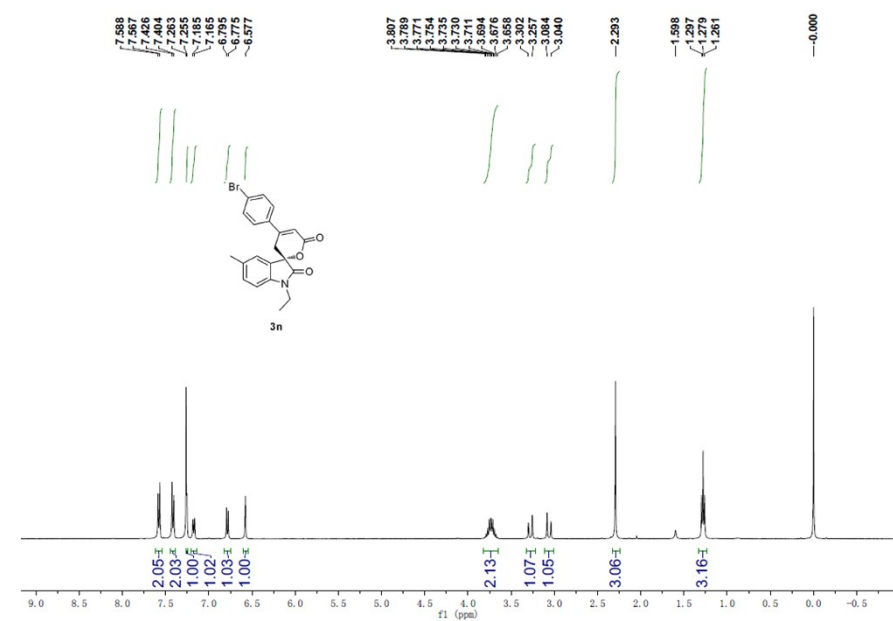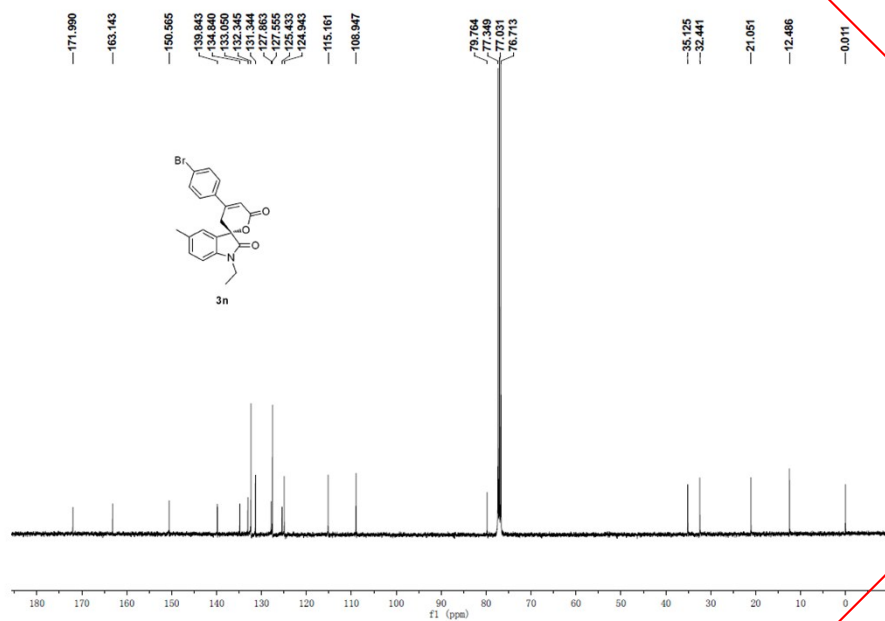

Comment [D]: 新增化合物 3n

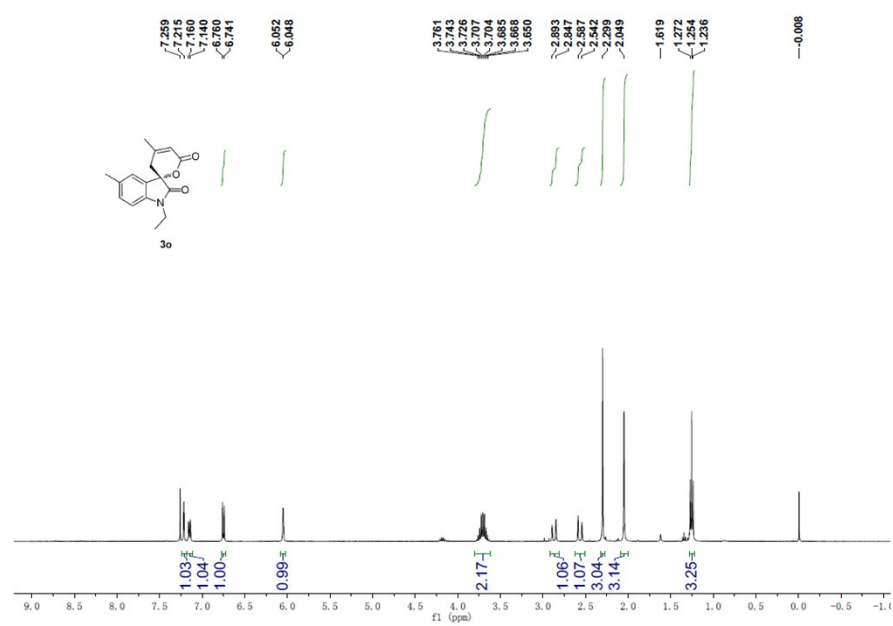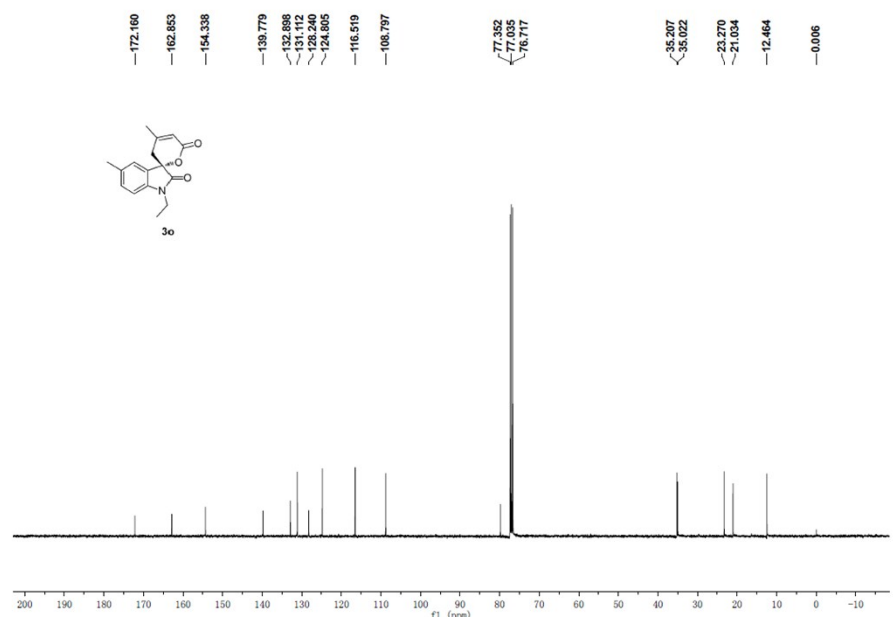

Comment [D]: 新增化合物 3o

## 6. HPLC Spectures

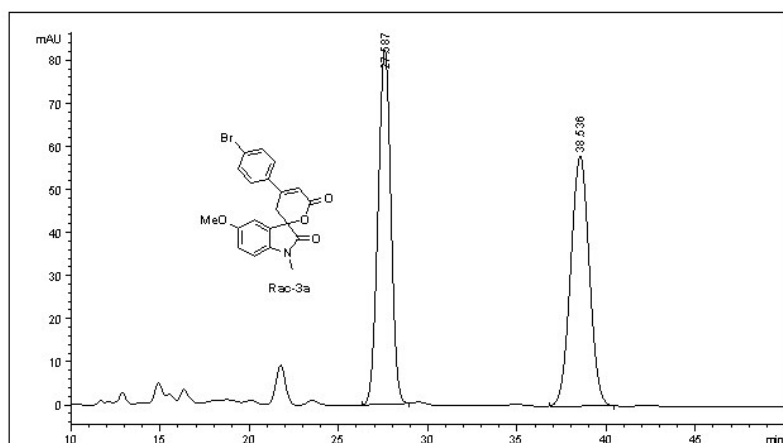

### Area Percent Report

Sorted By : Signal  
Multiplier : 1.0000  
Dilution : 1.0000  
Use Multiplier & Dilution Factor with ISTDs

Signal 1: MWD1 C, Sig=254,8 Ref=360,100

| Peak # | RetTime [min] | Type | Width [min] | Area [mAU*s] | Height [mAU] | Area %  |
|--------|---------------|------|-------------|--------------|--------------|---------|
| 1      | 27.587        | BB   | 0.7812      | 4128.06299   | 82.30220     | 49.5387 |
| 2      | 38.536        | BB   | 1.1140      | 4204.93848   | 57.98717     | 50.4613 |

Totals : 8333.00146 140.28937

\*\*\* End of Report \*\*\*

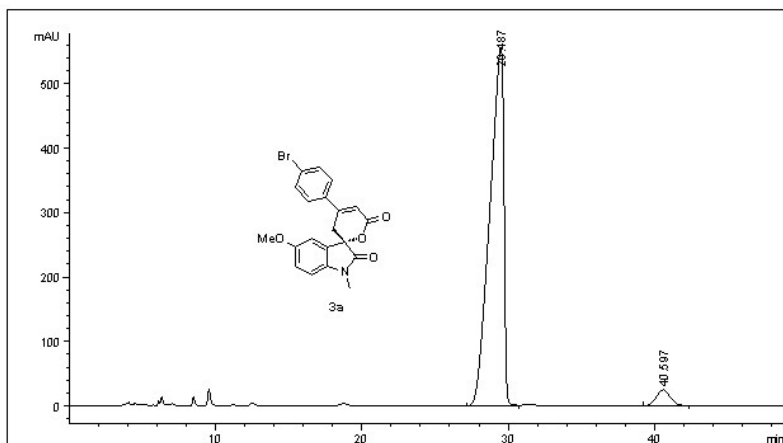

### Area Percent Report

Sorted By : Signal  
Multiplier : 1.0000  
Dilution : 1.0000  
Use Multiplier & Dilution Factor with ISTDs

Signal 1: MWD1 B, Sig=254,16 Ref=360,100

| Peak # | RetTime [min] | Type | Width [min] | Area [mAU*s] | Height [mAU] | Area %  |
|--------|---------------|------|-------------|--------------|--------------|---------|
| 1      | 29.487        | BV   | 0.9737      | 3.69045e4    | 556.48242    | 95.7478 |
| 2      | 40.597        | BB   | 1.0262      | 1638.94983   | 24.69736     | 4.2522  |

Totals : 3.85434e4 581.17978

\*\*\* End of Report \*\*\*

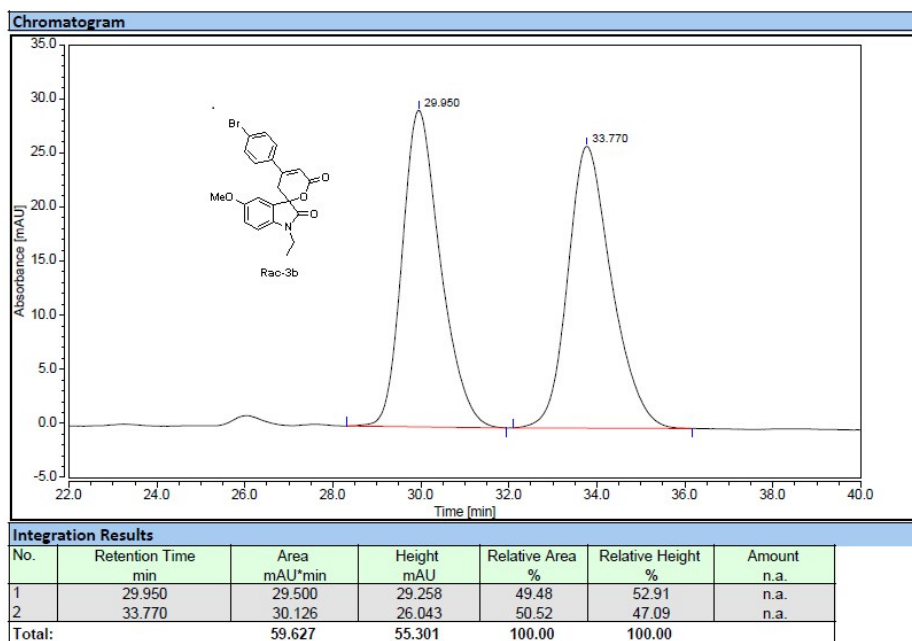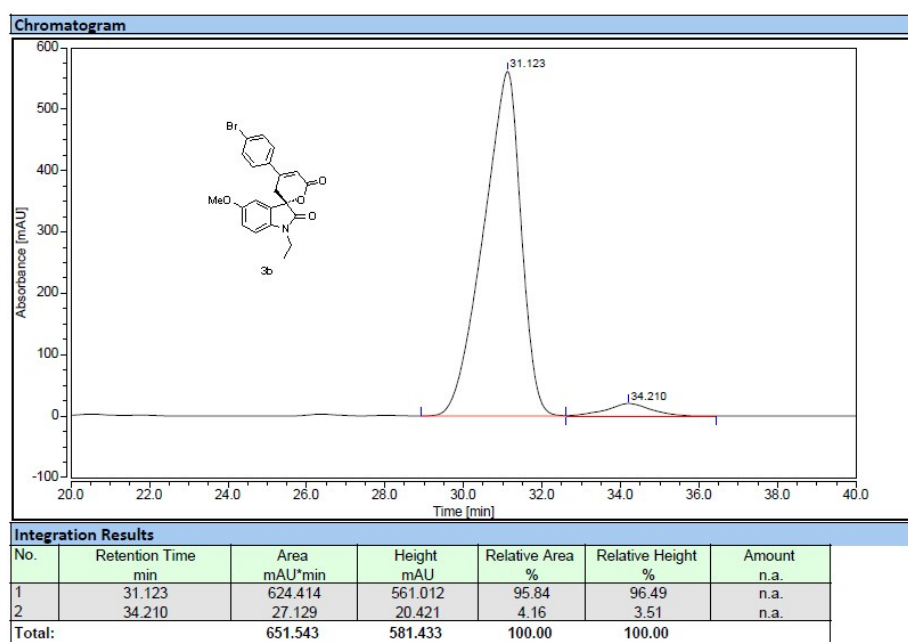

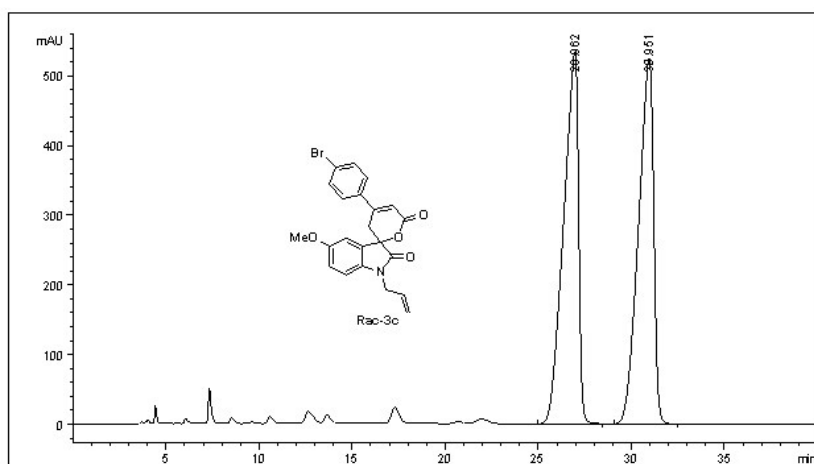

=====  
Area Percent Report  
=====

Sorted By : Signal  
Multiplier : 1.0000  
Dilution : 1.0000  
Use Multiplier & Dilution Factor with ISTDs

Signal 1: MWD1 B, Sig=254,16 Ref=360,100

| Peak # | RetTime [min] | Type | Width [min] | Area [mAU*s] | Height [mAU] | Area %  |
|--------|---------------|------|-------------|--------------|--------------|---------|
| 1      | 26.962        | BB   | 0.8284      | 2.96685e4    | 533.86200    | 50.0135 |
| 2      | 30.951        | BB   | 0.8625      | 2.96524e4    | 523.80133    | 49.9865 |

Totals : 5.93209e4 1057.66333

=====  
\*\*\* End of Report \*\*\*

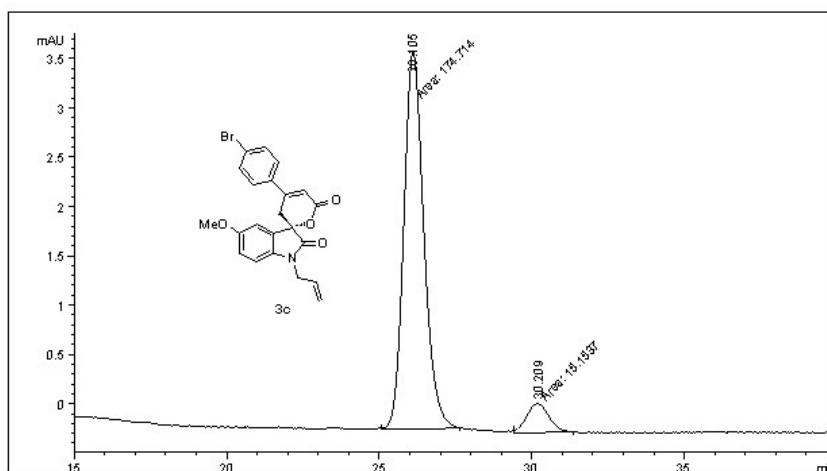

=====  
Area Percent Report  
=====

Sorted By : Signal  
Multiplier : 1.0000  
Dilution : 1.0000  
Use Multiplier & Dilution Factor with ISTDs

Signal 1: MWD1 B, Sig=254,16 Ref=360,100

| Peak # | RetTime [min] | Type | Width [min] | Area [mAU*s] | Height [mAU] | Area %  |
|--------|---------------|------|-------------|--------------|--------------|---------|
| 1      | 26.105        | NM   | 0.7624      | 174.71397    | 3.81949      | 92.0188 |
| 2      | 30.209        | NM   | 0.8540      | 15.15374     | 2.95725e-1   | 7.9812  |

Totals : 189.86772 4.11521

=====  
\*\*\* End of Report \*\*\*

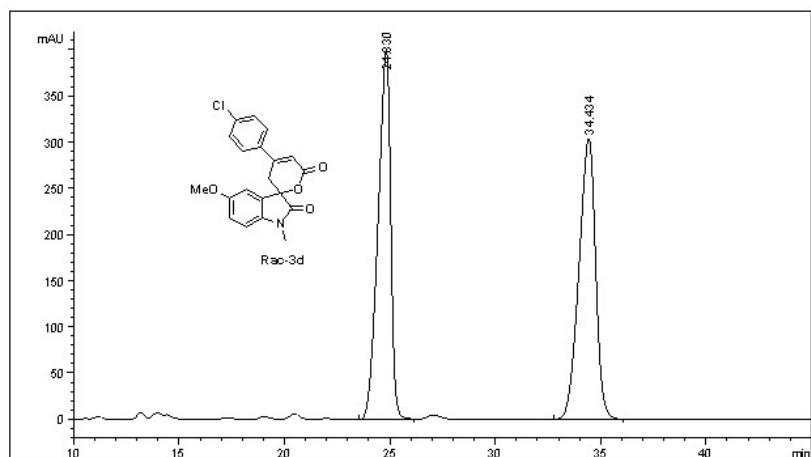

=====  
Area Percent Report  
=====

Sorted By : Signal  
Multiplier : 1.0000  
Dilution : 1.0000  
Use Multiplier & Dilution Factor with ISTDs

Signal 1: MWD1 B, Sig=254,16 Ref=360,100

| Peak # | RetTime [min] | Type | Width [min] | Area [mAU*s] | Height [mAU] | Area %  |
|--------|---------------|------|-------------|--------------|--------------|---------|
| 1      | 24.830        | BB   | 0.6353      | 1.66245e4    | 399.61536    | 49.9328 |
| 2      | 34.434        | BB   | 0.8462      | 1.66692e4    | 303.78613    | 50.0672 |

Totals : 3.32936e4 703.40149

=====  
\*\*\* End of Report \*\*\*

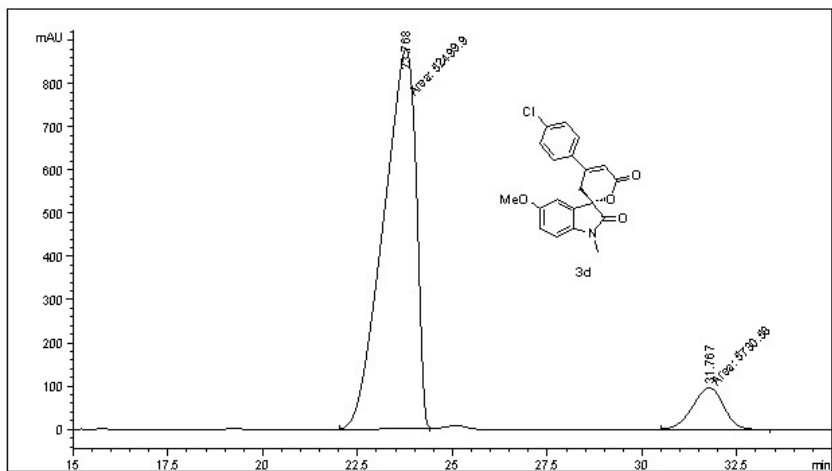

=====  
Area Percent Report  
=====

Sorted By : Signal  
Multiplier : 1.0000  
Dilution : 1.0000  
Use Multiplier & Dilution Factor with ISTDs

Signal 1: MWD1 B, Sig=254,16 Ref=360,100

| Peak # | RetTime [min] | Type | Width [min] | Area [mAU*s] | Height [mAU] | Area %  |
|--------|---------------|------|-------------|--------------|--------------|---------|
| 1      | 23.768        | MM   | 0.9969      | 5.24999e4    | 877.75183    | 90.1588 |
| 2      | 31.767        | MM   | 0.9754      | 5730.57520   | 97.92017     | 9.8412  |

Totals : 5.82305e4 975.67200

=====  
\*\*\* End of Report \*\*\*

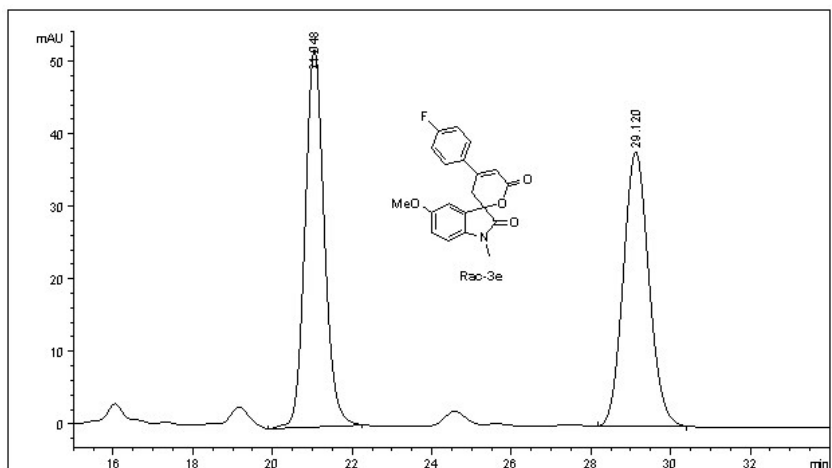

# Area Percent Report

Sorted By : Signal  
Multiplier : 1.0000  
Dilution : 1.0000  
Use Multiplier & Dilution Factor with ISTDs

Signal 1: MWD1 B, Sig=254,16 Ref=360,100

| Peak # | RetTime [min] | Type | Width [min] | Area [mAU*s] | Height [mAU] | Area %  |
|--------|---------------|------|-------------|--------------|--------------|---------|
| 1      | 21.048        | VB   | 0.5161      | 1748.11902   | 52.01600     | 50.7963 |
| 2      | 29.120        | BB   | 0.6899      | 1693.31055   | 37.85235     | 49.2037 |

Totals : 3441.42957 89.86835

\*\*\* End of Report \*\*\*

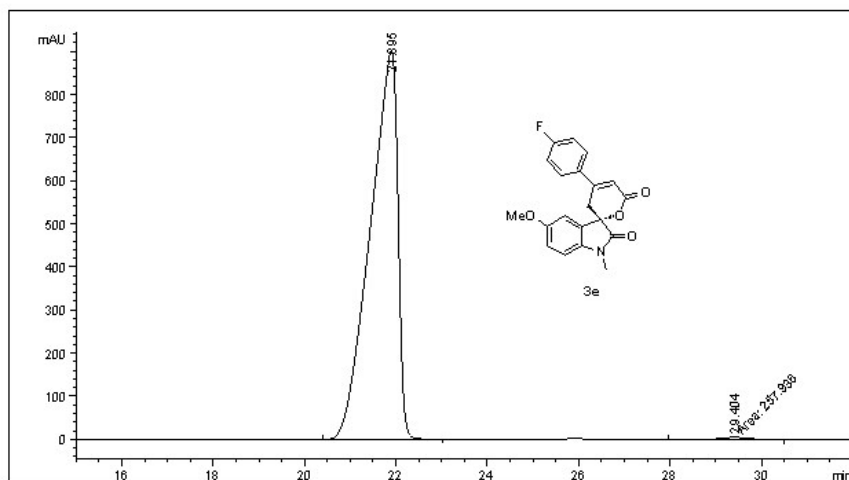

# Area Percent Report

Sorted By : Signal  
Multiplier : 1.0000  
Dilution : 1.0000  
Use Multiplier & Dilution Factor with ISTDs

Signal 1: MWD1 B, Sig=254,16 Ref=360,100

| Peak # | RetTime [min] | Type | Width [min] | Area [mAU*s] | Height [mAU] | Area %  |
|--------|---------------|------|-------------|--------------|--------------|---------|
| 1      | 21.895        | BB   | 0.6214      | 3.77943e4    | 900.97162    | 99.3222 |
| 2      | 29.404        | MM   | 0.7785      | 257.93561    | 5.52185      | 0.6778  |

Totals : 3.80523e4 906.49347

\*\*\* End of Report \*\*\*



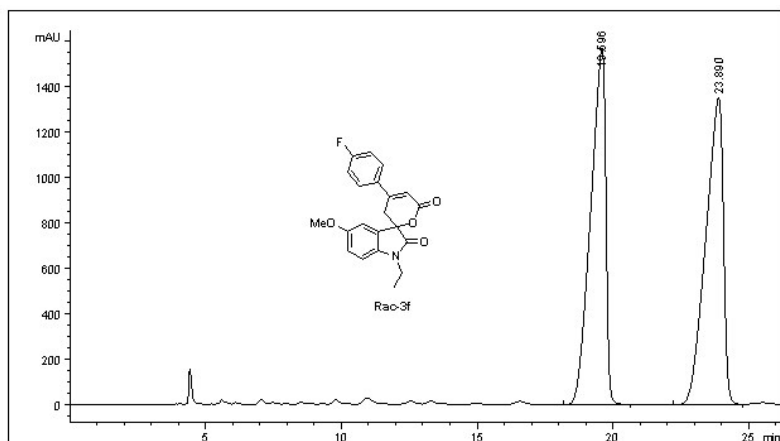

=====  
Area Percent Report  
=====

Sorted By : Signal  
Multiplier : 1.0000  
Dilution : 1.0000  
Use Multiplier & Dilution Factor with ISTDs

Signal 1: MWD1 B, Sig=254,16 Ref=360,100

| Peak # | RetTime [min] | Tvpe | Width [min] | Area [mAU*s] | Height [mAU] | Area %  |
|--------|---------------|------|-------------|--------------|--------------|---------|
| 1      | 19.596        | BB   | 0.5832      | 6.03765e4    | 1568.22717   | 49.9238 |
| 2      | 23.890        | VV   | 0.6897      | 6.05610e4    | 1349.05664   | 50.0762 |

Totals : 1.20938e5 2917.28381

=====  
\*\*\* End of Report \*\*\*  
=====

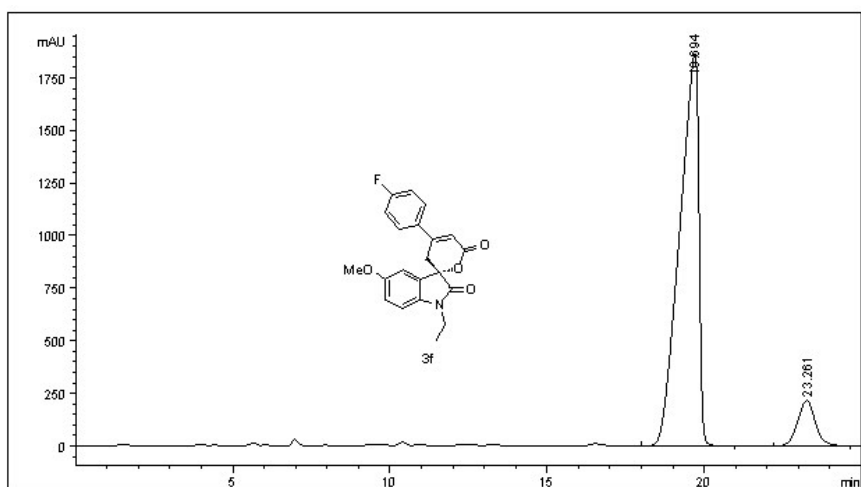

=====  
Area Percent Report  
=====

Sorted By : Signal  
Multiplier : 1.0000  
Dilution : 1.0000  
Use Multiplier & Dilution Factor with ISTDs

Signal 1: MWD1 B, Sig=254,16 Ref=360,100

| Peak # | RetTime [min] | Tvpe | Width [min] | Area [mAU*s] | Height [mAU] | Area %  |
|--------|---------------|------|-------------|--------------|--------------|---------|
| 1      | 19.694        | BB   | 0.6592      | 7.88383e4    | 1864.83313   | 90.3110 |
| 2      | 23.261        | BV   | 0.5959      | 8458.11621   | 216.46432    | 9.6890  |

Totals : 8.72964e4 2081.29745

=====  
\*\*\* End of Report \*\*\*  
=====

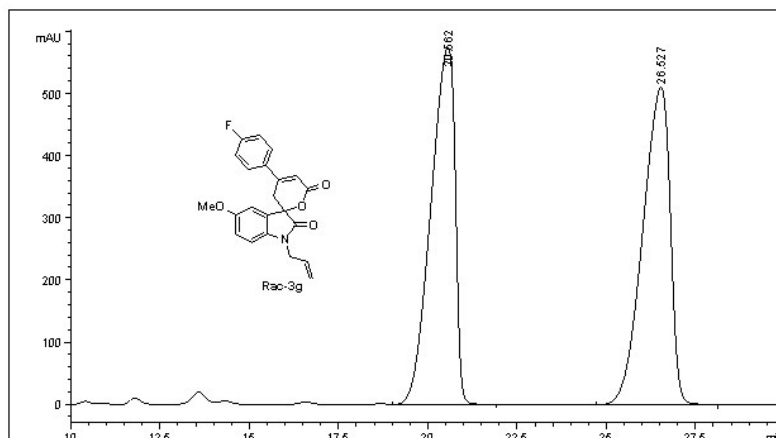

=====  
Area Percent Report  
=====

Sorted By : Signal  
Multiplier : 1.0000  
Dilution : 1.0000  
Use Multiplier & Dilution Factor with ISTDs

Signal 1: MWD1 B, Sig=254,16 Ref=360,100

| Peak # | RetTime [min] | Type | Width [min] | Area [mAU*s] | Height [mAU] | Area %  |
|--------|---------------|------|-------------|--------------|--------------|---------|
| 1      | 20.562        | VB   | 0.7524      | 2.72063e4    | 574.63806    | 49.9459 |
| 2      | 26.527        | BB   | 0.8510      | 2.72652e4    | 510.56363    | 50.0541 |

Totals : 5.44714e4 1085.20169

=====  
\*\*\* End of Report \*\*\*

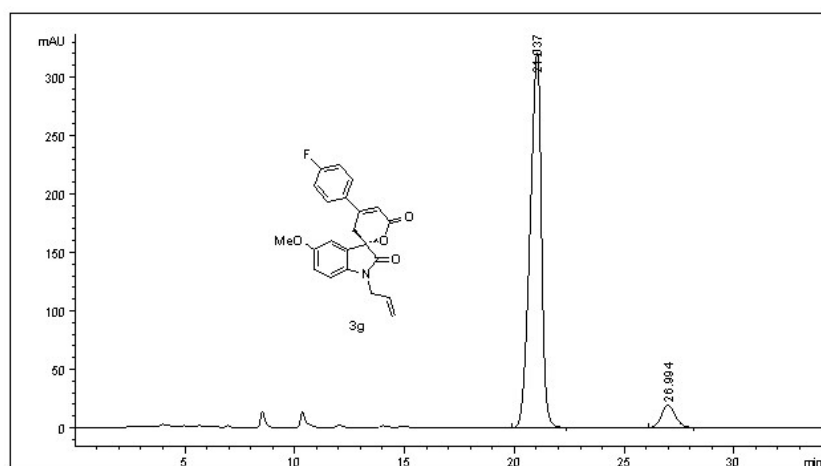

=====  
Area Percent Report  
=====

Sorted By : Signal  
Multiplier : 1.0000  
Dilution : 1.0000  
Use Multiplier & Dilution Factor with ISTDs

Signal 1: MWD1 B, Sig=254,16 Ref=360,100

| Peak # | RetTime [min] | Type | Width [min] | Area [mAU*s] | Height [mAU] | Area %  |
|--------|---------------|------|-------------|--------------|--------------|---------|
| 1      | 21.037        | BB   | 0.5444      | 1.15011e4    | 320.72775    | 93.1653 |
| 2      | 26.994        | BB   | 0.6665      | 843.73578    | 19.05745     | 6.8347  |

Totals : 1.23448e4 339.78520

=====  
\*\*\* End of Report \*\*\*

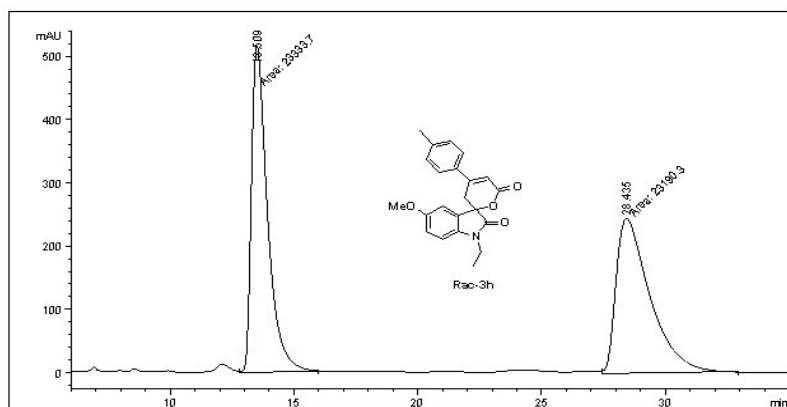

=====  
Area Percent Report  
=====

Sorted By : Signal  
Multiplier : 1.0000  
Dilution : 1.0000  
Use Multiplier & Dilution Factor with ISTDs

Signal 1: MWD1 B, Sig=254,16 Ref=360,100

| Peak #   | RetTime [min] | Type | Width [min] | Area [mAU*s] | Height [mAU] | Area %  |
|----------|---------------|------|-------------|--------------|--------------|---------|
| 1        | 13.509        | MM   | 0.7533      | 2.33337e4    | 516.22260    | 50.1541 |
| 2        | 28.435        | MM   | 1.5816      | 2.31903e4    | 244.38194    | 49.8459 |
| Totals : |               |      |             | 4.65240e4    | 760.60454    |         |

=====  
\*\*\* End of Report \*\*\*

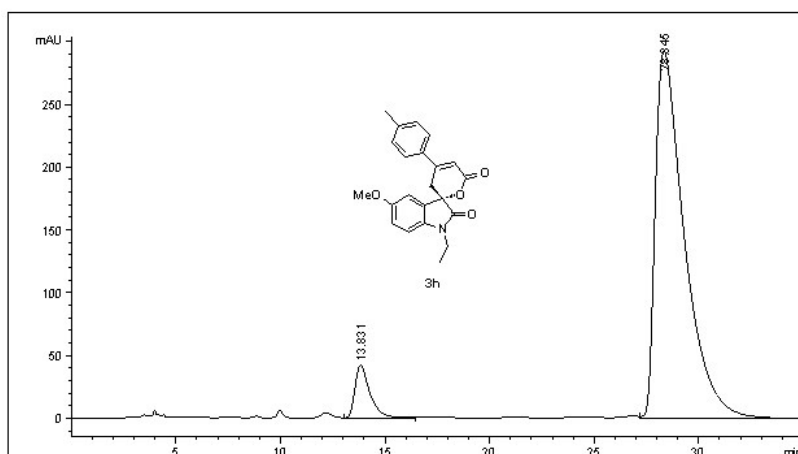

=====  
Area Percent Report  
=====

Sorted By : Signal  
Multiplier : 1.0000  
Dilution : 1.0000  
Use Multiplier & Dilution Factor with ISTDs

Signal 1: MWD1 B, Sig=254,16 Ref=360,100

| Peak #   | RetTime [min] | Type | Width [min] | Area [mAU*s] | Height [mAU] | Area %  |
|----------|---------------|------|-------------|--------------|--------------|---------|
| 1        | 13.831        | VV   | 0.7563      | 2173.01929   | 42.51846     | 7.1279  |
| 2        | 28.345        | VB   | 1.4326      | 2.83131e4    | 292.68225    | 92.8721 |
| Totals : |               |      |             | 3.04861e4    | 335.20071    |         |

=====  
\*\*\* End of Report \*\*\*

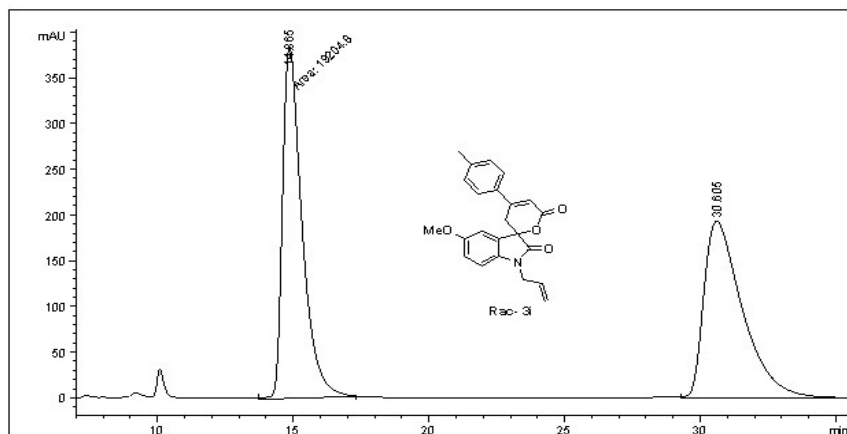

=====  
Area Percent Report  
=====

Sorted By : Signal  
Multiplier : 1.0000  
Dilution : 1.0000  
Use Multiplier & Dilution Factor with ISTDs

Signal 1: MWD1 B, Sig=254,16 Ref=360,100

| Peak #   | RetTime [min] | Type | Width [min] | Area [mAU*s] | Height [mAU] | Area %  |
|----------|---------------|------|-------------|--------------|--------------|---------|
| 1        | 14.865        | MM   | 0.8315      | 1.92048e4    | 384.91962    | 50.0780 |
| 2        | 30.605        | VBA  | 1.4895      | 1.91449e4    | 193.64267    | 49.9220 |
| Totals : |               |      |             | 3.83497e4    | 578.56229    |         |

=====  
\*\*\* End of Report \*\*\*

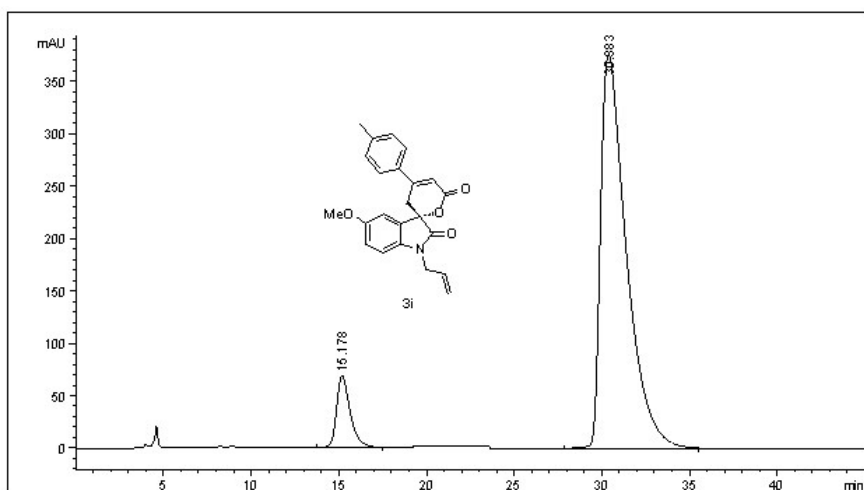

=====  
Area Percent Report  
=====

Sorted By : Signal  
Multiplier : 1.0000  
Dilution : 1.0000  
Use Multiplier & Dilution Factor with ISTDs

Signal 1: MWD1 B, Sig=254,16 Ref=360,100

| Peak #   | RetTime [min] | Type | Width [min] | Area [mAU*s] | Height [mAU] | Area %  |
|----------|---------------|------|-------------|--------------|--------------|---------|
| 1        | 15.178        | VB   | 0.8163      | 3769.61206   | 69.11324     | 8.9597  |
| 2        | 30.383        | BB   | 1.4859      | 3.83032e4    | 376.17947    | 91.0403 |
| Totals : |               |      |             | 4.20728e4    | 445.29271    |         |

=====  
\*\*\* End of Report \*\*\*

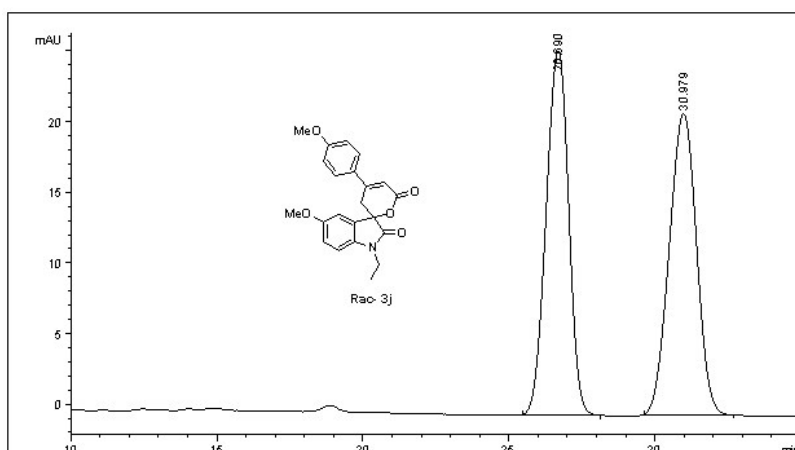

=====  
Area Percent Report  
=====

Sorted By : Signal  
Multiplier : 1.0000  
Dilution : 1.0000  
Use Multiplier & Dilution Factor with ISTDs

Signal 1: MWD1 C, Sig=254,8 Ref=360,100

| Peak # | RetTime [min] | Type | Width [min] | Area [mAU*s] | Height [mAU] | Area %  |
|--------|---------------|------|-------------|--------------|--------------|---------|
| 1      | 26.690        | BB   | 0.8448      | 1380.28467   | 25.77466     | 49.9018 |
| 2      | 30.979        | BB   | 0.9802      | 1385.71448   | 21.32373     | 50.0982 |

Totals : 2765.99915 47.09839

=====  
\*\*\* End of Report \*\*\*

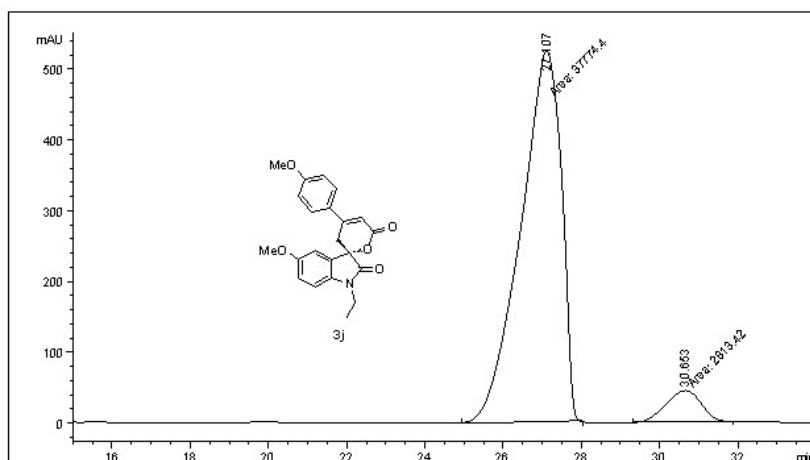

=====  
Area Percent Report  
=====

Sorted By : Signal  
Multiplier : 1.0000  
Dilution : 1.0000  
Use Multiplier & Dilution Factor with ISTDs

Signal 1: MWD1 C, Sig=254,8 Ref=360,100

| Peak # | RetTime [min] | Type | Width [min] | Area [mAU*s] | Height [mAU] | Area %  |
|--------|---------------|------|-------------|--------------|--------------|---------|
| 1      | 27.107        | MM   | 1.2025      | 3.77744e4    | 523.54712    | 93.0683 |
| 2      | 30.653        | MM   | 1.0544      | 2813.41675   | 44.47123     | 6.9317  |

Totals : 4.05878e4 568.01835

=====  
\*\*\* End of Report \*\*\*

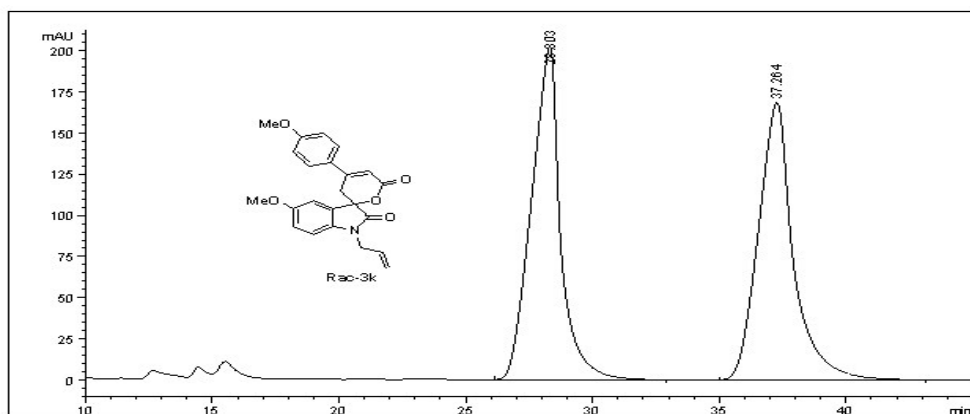

# Area Percent Report

Sorted By : Signal  
Multiplier : 1.0000  
Dilution : 1.0000  
Use Multiplier & Dilution Factor with ISTDs

Signal 1: MWD1 B, Sig=254,16 Ref=360,100

| Peak # | RetTime [min] | Type | Width [min] | Area [mAU*s] | Height [mAU] | Area %  |
|--------|---------------|------|-------------|--------------|--------------|---------|
| 1      | 28.303        | BB   | 1.1845      | 1.61094e4    | 202.40913    | 49.9908 |
| 2      | 37.264        | BB   | 1.4119      | 1.61153e4    | 168.48386    | 50.0092 |

Totals : 3.22246e4 370.89299

\*\*\* End of Report \*\*\*

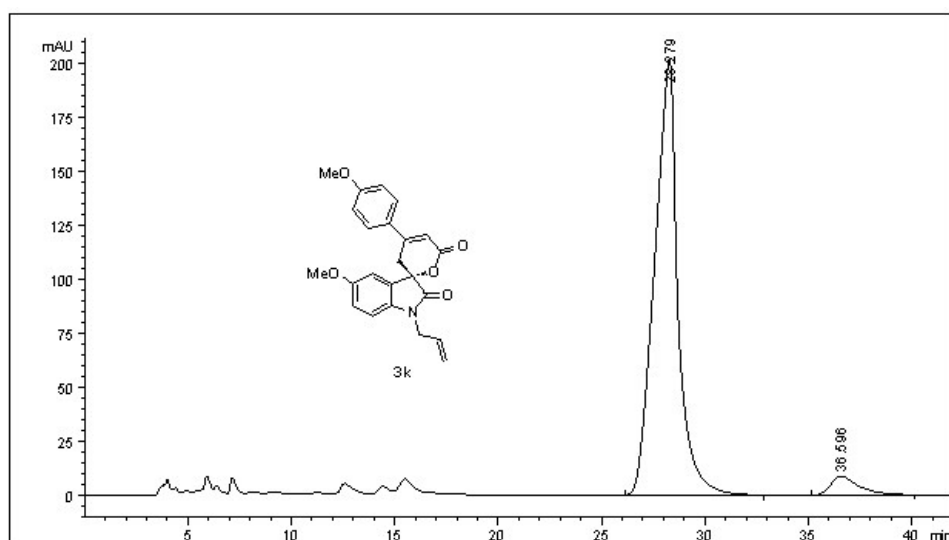

# Area Percent Report

Sorted By : Signal  
Multiplier : 1.0000  
Dilution : 1.0000  
Use Multiplier & Dilution Factor with ISTDs

Signal 1: MWD1 B, Sig=254,16 Ref=360,100

| Peak # | RetTime [min] | Type | Width [min] | Area [mAU*s] | Height [mAU] | Area %  |
|--------|---------------|------|-------------|--------------|--------------|---------|
| 1      | 28.279        | BB   | 1.1466      | 1.58190e4    | 201.78352    | 94.8655 |
| 2      | 36.596        | BB   | 1.4181      | 856.19135    | 8.77700      | 5.1345  |

Totals : 1.66751e4 210.56052

\*\*\* End of Report \*\*\*

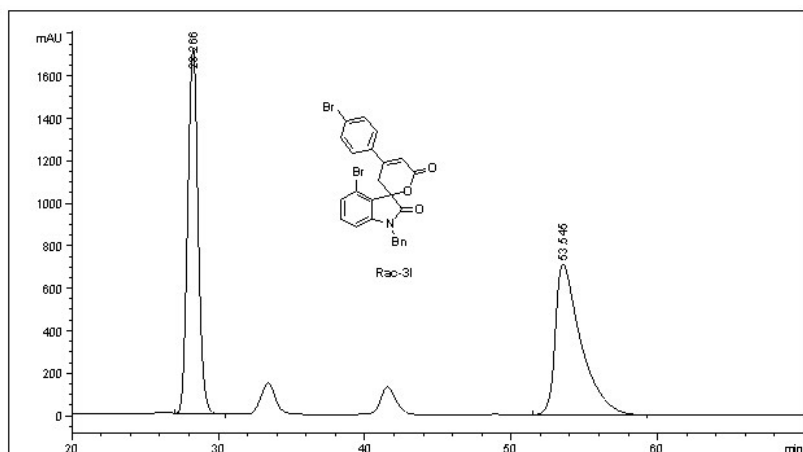

=====  
Area Percent Report  
=====

Sorted By : Signal  
Multiplier : 1.0000  
Dilution : 1.0000  
Use Multiplier & Dilution Factor with ISTDs

Signal 1: MWD1 B, Sig=254,16 Ref=360,100

| Peak # | RetTime [min] | Type | Width [min] | Area [mAU*s] | Height [mAU] | Area %  |
|--------|---------------|------|-------------|--------------|--------------|---------|
| 1      | 28.266        | VB   | 0.7769      | 8.52484e4    | 1718.11914   | 49.8320 |
| 2      | 53.545        | BB   | 1.6828      | 8.58232e4    | 708.73456    | 50.1680 |

Totals : 1.71072e5 2426.85370

=====  
\*\*\* End of Report \*\*\*

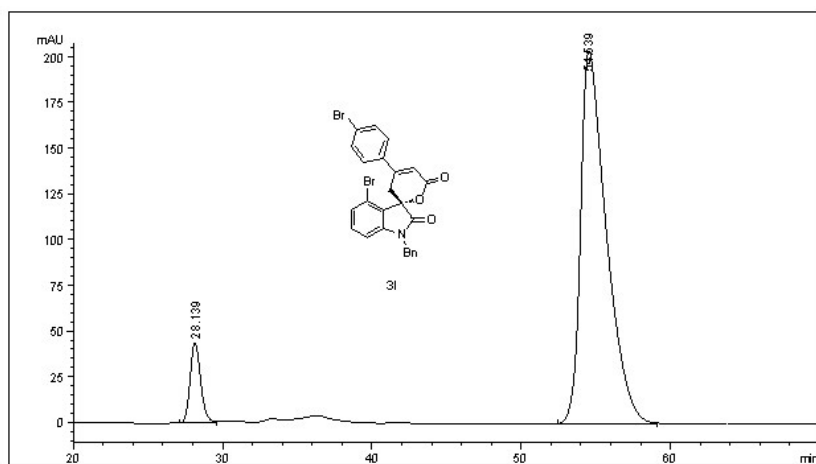

=====  
Area Percent Report  
=====

Sorted By : Signal  
Multiplier : 1.0000  
Dilution : 1.0000  
Use Multiplier & Dilution Factor with ISTDs

Signal 1: MWD1 B, Sig=254,16 Ref=360,100

| Peak # | RetTime [min] | Type | Width [min] | Area [mAU*s] | Height [mAU] | Area %  |
|--------|---------------|------|-------------|--------------|--------------|---------|
| 1      | 28.139        | BB   | 0.7528      | 2125.80151   | 43.75694     | 8.0333  |
| 2      | 54.539        | BB   | 1.7072      | 2.43365e4    | 203.79347    | 91.9667 |

Totals : 2.64623e4 247.55042

=====  
\*\*\* End of Report \*\*\*

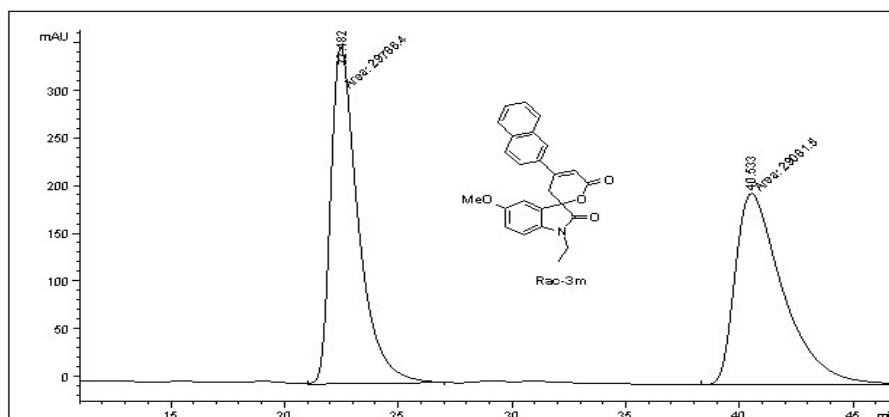

=====  
Area Percent Report  
=====

Sorted By : Signal  
Multiplier : 1.0000  
Dilution : 1.0000  
Use Multiplier & Dilution Factor with ISTDs

Signal 1: MWD1 B, Sig=254,16 Ref=360,100

| Peak #   | RetTime [min] | Type | Width [min] | Area [mAU*s] | Height [mAU] | Area %  |
|----------|---------------|------|-------------|--------------|--------------|---------|
| 1        | 22.482        | MM   | 1.4042      | 2.97864e4    | 353.55222    | 50.5987 |
| 2        | 40.533        | MM   | 2.4251      | 2.90815e4    | 199.86505    | 49.4013 |
| Totals : |               |      |             | 5.88680e4    | 553.41727    |         |

=====  
\*\*\* End of Report \*\*\*

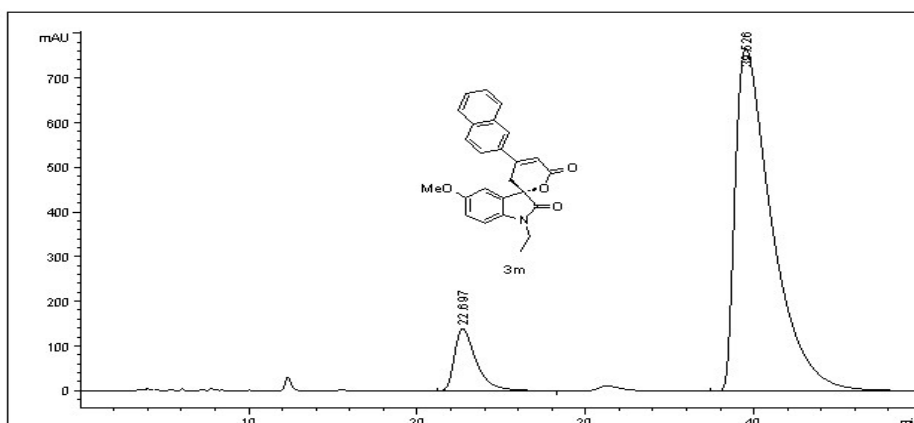

=====  
Area Percent Report  
=====

Sorted By : Signal  
Multiplier : 1.0000  
Dilution : 1.0000  
Use Multiplier & Dilution Factor with ISTDs

Signal 1: MWD1 B, Sig=254,16 Ref=360,100

| Peak #   | RetTime [min] | Type | Width [min] | Area [mAU*s] | Height [mAU] | Area %  |
|----------|---------------|------|-------------|--------------|--------------|---------|
| 1        | 22.697        | BB   | 1.3626      | 1.26716e4    | 139.65680    | 9.8353  |
| 2        | 39.526        | BBA  | 2.2446      | 1.16167e5    | 768.04095    | 90.1647 |
| Totals : |               |      |             | 1.28838e5    | 907.69775    |         |

=====  
\*\*\* End of Report \*\*\*



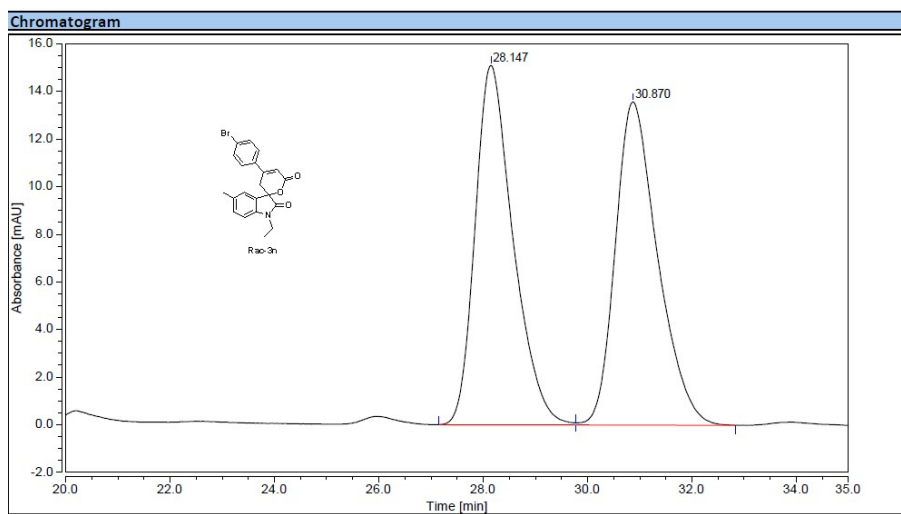

| Integration Results |                       |                 |               |                    |                      |                |
|---------------------|-----------------------|-----------------|---------------|--------------------|----------------------|----------------|
| No.                 | Retention Time<br>min | Area<br>mAU*min | Height<br>mAU | Relative Area<br>% | Relative Height<br>% | Amount<br>n.a. |
| 1                   | 28.147                | 12.748          | 15.104        | 49.96              | 52.65                | n.a.           |
| 2                   | 30.870                | 12.768          | 13.583        | 50.04              | 47.35                | n.a.           |
| Total:              |                       | 25.516          | 28.687        | 100.00             | 100.00               |                |

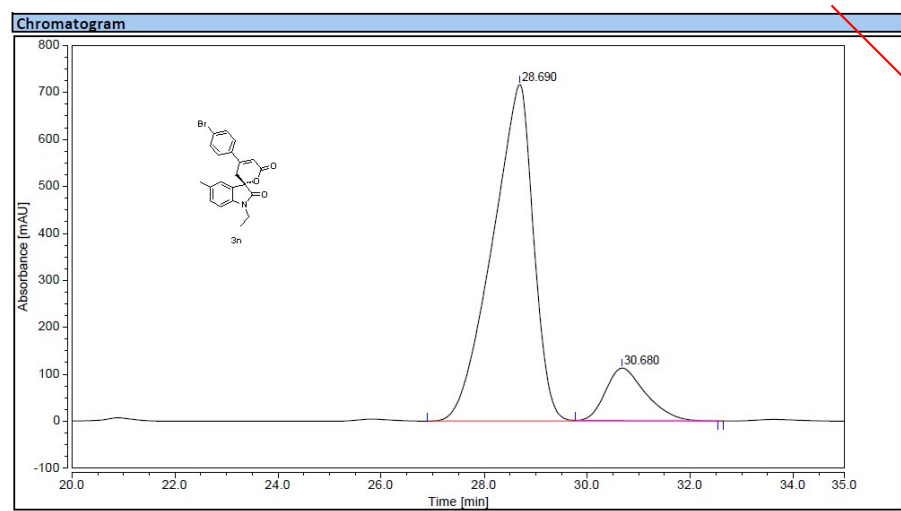

| Integration Results |                       |                 |               |                    |                      |                |
|---------------------|-----------------------|-----------------|---------------|--------------------|----------------------|----------------|
| No.                 | Retention Time<br>min | Area<br>mAU*min | Height<br>mAU | Relative Area<br>% | Relative Height<br>% | Amount<br>n.a. |
| 1                   | 28.690                | 663.247         | 716.804       | 86.86              | 86.52                | n.a.           |
| 2                   | 30.680                | 100.372         | 111.666       | 13.14              | 13.48                | n.a.           |
| Total:              |                       | 763.619         | 828.469       | 100.00             | 100.00               |                |

Comment [D]: 新增化合物 3n

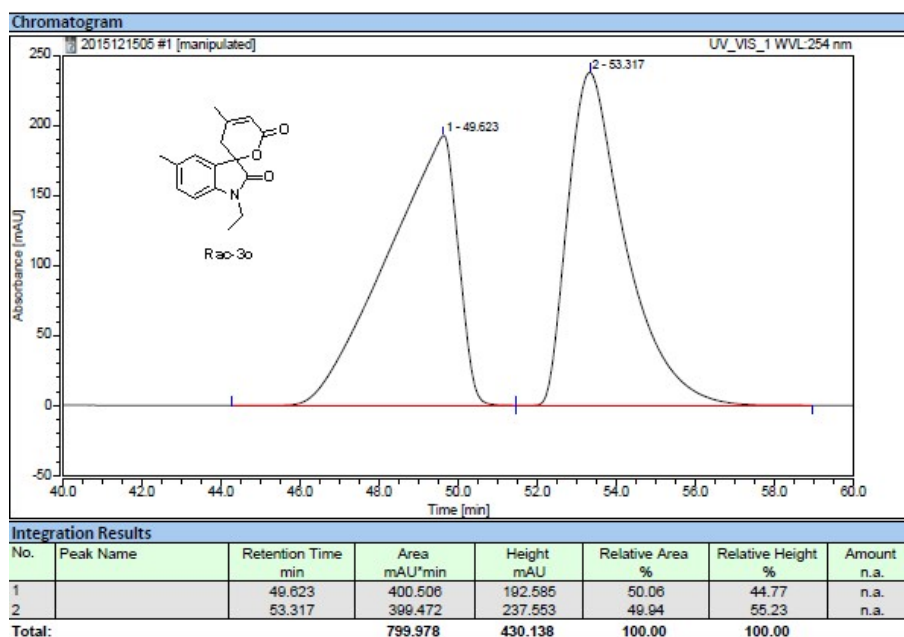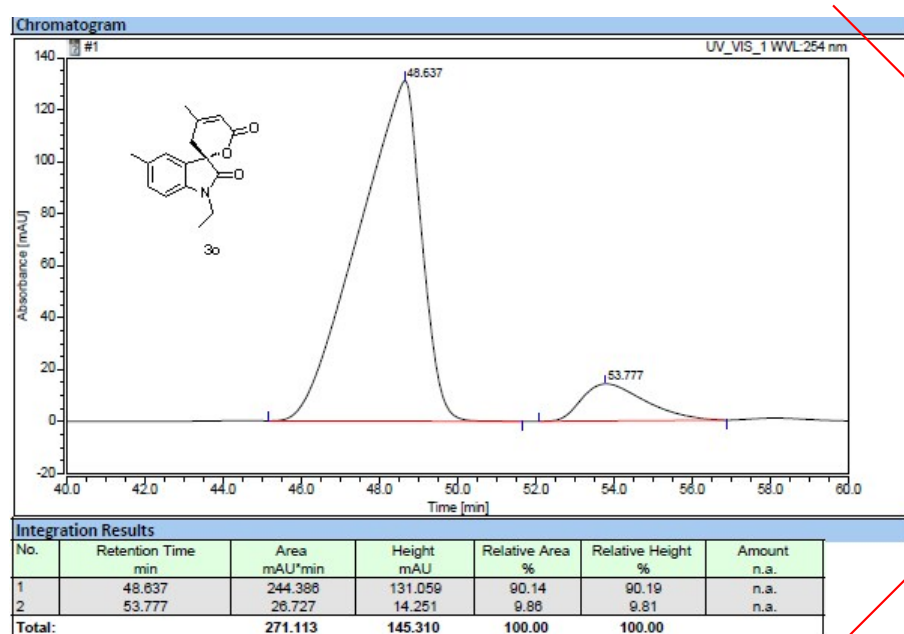

Comment [D]: 新增化合物 3o
